# Supplementary material for: The selection landscape and genetic legacy of ancient Eurasians
Source: PubMed Central journal article supplement (PMC10781624; doi:10.1038/s41586-023-06705-1), 2024-01-10
Supplement: 41586_2023_6705_MOESM3_ESM.pdf [file 41586_2023_6705_MOESM3_ESM.pdf]

## Peer Review File

**Manuscript Title:** THE SELECTION LANDSCAPE AND GENETIC LEGACY OF ANCIENT EURASIANS

### Reviewer Comments & Author Rebuttals

#### Reviewer Reports on the Initial Version:

Referee expertise:

Referee #1: human evolutionary genetics

Referee #2: aDNA/human evolution

Referee #3: population genetics

Referees' comments:

Referee #1 (Remarks to the Author):

This manuscript integrates several hundred new ancient human DNA samples along with previous human aDNA data to build a dataset of ~1600 imputed ancient genomes. It then applies several new computational methods for the inference of admixture proportions and allele frequency changes suggestive of selection. A major strength of the approach is the ability to control for differences in ancestral background in ancient and modern samples. The resulting catalog of evolutionary pressures on European phenotypes over that past 12,000 years suggests that ancient selection and admixture have played a larger role in modern phenotypes than recent local selection.

Major Comments:

The two paragraphs from lines 123-153 describe the data and fundamental analytic methods used in this study, and as such, they are essential to the plausibility and interpretation of all subsequent results. These approaches include several predictive analyses that integrate new methods and data from this manuscript with recently published methods. While I appreciate the length constraints, extensive supplementary material, and desire to get to the results quickly, more detail on these methods (especially their accuracy and validation) must be provided in the main text.

To illustrate this, here are some of the new claims the reader is asked to accept in these paragraphs without any details in main text (and this is assuming that existing methods like RELATE and CLUES are sufficiently accurate):

- The ancient genomes are accurately imputed and phased.
- The new chromosome painting ancestry inference method is accurate at the haplotype level on both ancient and modern genomes.
- The simulation framework is not sensitive to misspecification/inaccuracies in the four-population admixture model.

- The neural network classifier for ancestral path inference is sufficiently accurate.
- The updates to the CLUES framework enable accurate allele frequency and selection coefficient estimates. (Big kudos for the snakemake and clear github page.)
- The control set of SNPs is appropriate.

I found these approaches to generally be reasonable and the details in the supplementary material to be helpful, but the evaluation was often lacking. To illustrate this, I provide a few non-exhaustive examples where more validation/justification are needed. In the section on the neural network to predict paths backward in time (S1a), the only evaluation provided is the confusion matrix on simulated data in Figure S1a.2. It seems that there is considerable misclassification even on the simulated data. (However, I note that there is not a scale bar, so I can't really evaluate the magnitude of the values in each box.) In S2b, there is no evaluation of the method for inferring allele frequency changes influenced by bias. And there is not a justification for the 0.5 threshold on  $F_{ij}$ . Out of the context of the distribution of this metric across sites or its effect on the likelihood of inferring selection, this still seems quite low. Similarly in the most of the supplementary sections I did not find the level of evaluation I expected.

Following on this, the bigger point is that it is challenging to evaluate the sensitivity of the results to inaccuracies in each of the modeling and predictive steps listed above. Given that the results of one analysis are often used as inputs to the next, I fear the potential for errors and propagation. Anything the authors can do to better understand this would be extremely valuable in establishing confidence in the results.

I appreciated the comparison to the control group in the GWAS variant selection analyses, but I have two questions about this. First, isn't it important to match the control SNPs on LD as well as MAF, since it is likely associated both with the probability that a variant is a GWAS hit and experienced selection? This is commonly done in tools like SNPSNAP. Second, the finding of many more selection peaks when conditioning on ancestry is interesting. However, there was not any evaluation via simulations of the power to detect different types of selective events when considering ancestry or not. Couldn't this just be due to an increase in power when considering ancestry?

Given the challenges of porting polygenic risk scores across even closely related populations, I was very surprised to see the attempts at PRS-based ancestral trait reconstruction. The authors are aware of these challenges and repeatedly suggest "caution" in the interpretation. This is insufficient as no work has been done to evaluate the feasibility or accuracy of this analysis. Given the known challenges and lack of specific hypotheses guiding these analyses, their value to the manuscript is not clear. I would suggest removing these if stronger justification cannot be provided. (Also, PMID: 29285967 should be cited.) That said, the estimation of the contributions of different ancestral populations to variation in phenotypes in the UK Biobank seems on stronger methodological footing. However, these results are not presented in any detail except to say that they point to a way forward for disentangling ancestry contributions to differences in genetic disease risk (L460). I suggest expanding the presentation of these results instead of the ancient phenotype prediction.

I would also like to see more direct discussion of how the results relate to those of a few recent similar studies. For example:

doi: <https://doi.org/10.1101/2022.07.02.498543> and <https://doi.org/10.1101/2022.08.24.505188> both have traced selection over the past 10,000 years using different methods. PMID: 36316412 argued that admixture can hide selective events.

Minor Comments:

While I appreciate that the details of the construction of the cohort are provided in a companion paper, a few more sentences and perhaps a figure panel describing the geographic locations and ages would be helpful.

Tone down exaggerated statements. For example, on L111 and L119, is this dataset truly “unprecedented”? While this is a wonderful dataset, by now many studies have analyzed hundreds of ancient individuals’ genomes. Thus, I disagree that it is unprecedented.

Similarly, I thought the insights into the timing and different variants potentially involved in selection at the LCT/MCM6 locus were fascinating. But it is not clear to me that this analysis will completely settle the “controversies regarding the timing of this selection” on lactose digestion (L172).

And again, in the discussion of height and selection (L464-470), this study adds valuable new data and hypotheses, but I am not convinced that it is “settled” (and I don’t have a stake in this debate) so I would reframe this section

The sweep “loci” seem extreme large from several of the examples given: multiple Mb for most and 33 Mb for HLA. Can the authors comment on whether this is a resolution issue or likely to reflect selection on multiple variants within these windows (as would be expected for a locus like the HLA)?

At several points a “population structure axis separating” populations is referred to with a reference to Figure 2. I believe that this is in error. Perhaps it should be Figure 4A? Also, the variance explained by the PCs is incredibly small.

Figure 1: I do not see a blue line for pop\_4. But perhaps it is not supposed to appear since the numbering starts with 0?

I suspect that this is a PDF conversion issue, but all the figures are blurry.

Referee #2 (Remarks to the Author):

Irving-Pease et al. report analysis searching for natural selection in a large set of >1,600 imputed shotgun genomes, many of which were produced in a "main paper" (Allentoft et al.) to which this paper is a companion paper. They take approaches including inference of selection coefficients on genealogies, decomposition of evolution in different ancestral populations, evolution of polygenic traits and evidence for adaptation on those, and searching for structural variants with evidence of pathogenicity.

The paper is well-written, and several approaches and analysis here are highly interesting and definitely push the field of studying natural selection with ancient DNA forward (for example, the ancestry-decomposed inference of selection coefficients), but it is less clear which new biological insights are learned, and there are several issues that need mention and clarification.

The paper consists of hundreds, perhaps thousands, of claims of selection on single variants and traits, each caveated largely appropriately, but the study is thus different from most papers focusing on presenting tight waterproof evidence for a handful of central claims. Reading the paper, I can see a few claims that I am guessing that the authors are highly confident in, but also others where I am unsure of what level of confidence there actually is.

Of the major claims in the abstract:

-Selection on metabolism, and HLA seems to have been reported previously (e.g. Mathieson et al. 2015, Nature). The link between immune selection and autoimmune disease is entirely speculation, no new advance on the possible link is reported.

-Selection at the FADS cluster and the lactase persistence locus began earlier than previously thought. This seems like novel claims, and the evidence seems strong. At the same time, saying that the debate is "settled" is probably premature. This claim could be supported by additional evidence, how robust is the new timing proposed by the authors, and exactly what timings had been suggested before?

--Differential genetic contributions in height ancestral to present-day Europeans. Yamnaya introduced tall height. This seems largely in line with previous finds (e.g. by Mathieson et al. 2015; Cox and Mathieson 2020, PNAS).

--"Alleles associated with increased risk of some mood-related phenotypes are overrepresented in the farmer ancestry component." "Western hunter-gatherers show a strikingly high contribution of alleles conferring risk of traits related to diabetes." These seem like novel claims, but are the authors confident of the claims, or do they think it could be subject to the caveats about projecting GWAS scores from present-day panels into the past that they bring up in the text? If they want present this as a significant scientific advance, can they expand on the evidence for this, and the robusticity of the analysis. How outlying are the scores for these?

--"a combination of ancient selection and migration, rather than recent local selection, is the primary driver of present-day phenotypic differences in Europe." To me this seems to have been the consensus for some time. Have recent papers suggested it was due to local selection?

There is an interesting find of natural selection on an inversion and duplication of KANSL1, but this is not mentioned in the abstract.

Overall, a lot of the novel results seem to be claims about different timing of selection, than what has been suggested in previous paper. However, the authors don't really provide extensive simulation results or other validation experiments on how robust their timing inference is.

Overall, it is difficult to disentangle the scientific advance of the paper from that of the data that it presents the first selection analyses on, but were really produced by another paper (which will be cited for the data itself). That said, this paper has some very interesting analyses going, in some ways more interesting than the advances presented in the parallel submission with the new data.

Major issues:

The authors conduct their main selection analysis (CLUES) not on the whole genome, but on a selected set of 33k SNPs from the GWAS catalog. They then match those with a neutral set. This seems like a sensible way to test if those SNPs have been subject to selection, but the caveat is that when they then dissect the selection peaks in the data, the actually targeted variant may lay somewhere nearby in the genome. There is thus an extra risk that when they discuss variants subject to selection and associated with particular traits in the text, the natural selection was not on those traits. I presume that this was not done genome-wide since CLUES is not easily scaled to such data, but this particular approach seems to increase the risk of storytelling, as there will always be a well-documented GWAS SNP at the height of every signal peak. Could the authors provide convincing evidence that those top SNPs are in fact the SNPs targeted by selection?

Imputation seems key to the conclusion in the paper, could the authors discuss a bit more about how the results could be robust to imputation?

The authors also seem to discuss one primary trait association for each SNP. Are any of the SNPs discussed in the main text associated with multiple traits?

The CLUES inferred trajectories seem highly constrained, but to which degree is this due to the heatmap colour scheme used in the supplementary figures. Could they colour values down to posterior probability  $\sim 0.05$  more clearly? Also, these trajectories take the imputation and genealogical inference for granted, and thus do not portray the uncertainty associated with those.

On page 34 in the supplement, they report that in the CLUES analysis of aDNA with Ancestral Paintings, they identify quite substantial numbers of outliers also in the control set of SNPs, 346 in the GWAS group and 63 in the Control group. This doesn't seem to be mentioned in the main text.

The authors investigate the correlation of PCs with polygenic scores for traits such as height, but it does not seem appropriate to treat individuals as independent observations (they are related at different degrees), so it seems that some by-chromosome bootstrap or similar could gauge evolutionary uncertainty.

Regarding the possibility of SNPs beginning a frequency rise earlier than the classic lactase persistence candidate, the suggested 12,000 years ago for rise in frequency of rs1438307 is quite a bit further into the past than the majority of data available. Could the authors add confidence intervals to Figure S2a.44. If this is a major claim, then that figure could serve as a main text figure panel too.

Could the authors provide a more intuitive rationale for why conditioning on ancestry in their particular analysis setup provides additional power to detect selection?

Why did the authors opt for a 4-way mixture model with EHG and CHG, instead of WHG, Anatolia, and Yamnaya?

"in chromosome 18, we recover a selection candidate region spanning SMAD7, which is associated with inflammatory bowel diseases such as Crohn's disease 41–43. Taken together these results suggest that the transition to agriculture imposed a substantial amount of selection for humans to adapt to our new diet and that some diseases observed today in modern societies can likely be understood as a consequence of this selection."

-The link between ancient selection and present-day disease seems overly speculative based on the data presented in this paper.

"However, profound shifts in lifestyle in Eurasian populations during the Holocene, including a change in diet and closer contact with domestic animals, combined with higher mobility and increasing population sizes, are likely drivers for strong selection on loci involved in immune response."

-Maybe, but there is no firm data on this yet. Perhaps the authors could say "have been hypothesized to be likely drivers...."

"These results suggest that large, recurrent CNVs that can lead to several pathologies were present at similar frequencies in the ancient and modern populations included in this study. " Can it really be assumed that the ancient sample is representative of the past frequencies? It seems too much to make conclusions about prevalence.

[Minor points, requested clarifications, typos]

Table S2d.3 West Eurasia.cw\_hg spans 40 pages. Can it be reduced?

Abstract:

Page 1: "high contribution of alleles conferring risk of traits related to diabetes." wording

Results/discussion:

Samples and data

Page 3: "Unprecedented sample", "unprecedented details" repeat words

Figure 1

Sampling times and pop split times don't line up, especially 180 generations ago

Maybe add borders to distinguish the different parts, legends etc

Selection on diet-associated loci

Page 5: "settling controversies regarding the timing of this selection" too strong word

Genetic trait reconstruction and the phenotypic legacy of ancient Europeans

Page 13: "help to settle the famous discussion of selection in Europe relating to height" again perhaps too bold a claim

Referee #3 (Remarks to the Author):

This paper presents multiple extremely interesting analyses of patterns of genetic variation across several hundred ancient genomes, shedding new light on how natural selection drove rapid changes in allele frequency at a number of loci across the genome during the evolutionary history of modern Europeans. The methods are innovative, and the results provide new insights into the timing of the onset of natural selection for several mutations that are known to have played an important role in adaptation as human migrated into and across Europe (e.g. FADS, LCT), as well as the identification of new candidate selective sweeps that were previously obscured by the effects of admixture. My criticisms below notwithstanding, it represents a real triumph for aDNA in looking back in time to reconstruct human evolutionary history. I think that many of the analyses and results potentially of interest to the broad Nature readership.

However, there are several aspects of the manuscript that need work. I have one major substantive criticism, as well as some frustration that several aspects of the manuscript simply do not appear ready for publication.

#####

My substantive criticism:

the connection between a particular positive selection signal and a given nearby complex trait association is often not clear. In many cases, the actual evidence of a link is extremely weak or altogether absent, but the manuscript is framed as if such evidence exists.

###

For example, psoriasis is mentioned in the abstract as a phenotype that has a high prevalence, and imply that their results may explain why. As far as I can tell, aside from the supplementary tables the only mention of psoriasis in the paper is in this sentence:

"In contrast, the signal of selection at C2 (rs9267677;  $p=9.82e-14$ ;  $s=0.04463$ ), also found within this sweep, and associated with psoriasis risk in UK Biobank ( $p=4.1e-291$ ;  $OR=2.2$ ), shows a gradual increase in frequency beginning c. 4,000 years ago, before rising more rapidly c. 1,000 years ago."

However, I noticed a nearly identical sentence in the supplement, but the phenotype mentioned there is educational attainment:

"In contrast, the signal of selection at C2 (rs9267677;  $p=9.82e-14$ ;  $s=0.04463$ ), also found within this sweep, and associated with educational attainment, shows a gradual increase in frequency

beginning c. 4,000 years ago, before rising more rapidly c. 1,000 years ago; highlighting the complex temporal dynamics of selection at the HLA locus."

Would the authors also be willing to argue in the abstract that this signal of selection may help explain patterns of variation in educational attainment? The strength of the evidence for either conclusion is basically the same.

###

Another example, not directly related to the main, selective sweep focus of the paper, is in the section titled: "Pathogenic structural variants in ancient vs. modern-day humans".

The authors write:

"RISE586 exhibited a hypoplastic tooth, spondylolysis of the L5 vertebrae, incomplete coalescence of the S1 sacral bone, among other minor skeletal phenotypes. The skeletal phenotypes observed in this individual are relatively common (~10%) in European populations and are not specific to 16p13.1 thus do not indicate strong penetrance of this mutation in RISE586. However, these results do highlight our ability to link putatively pathogenic genotypes to phenotypes in ancient individuals."

I do not see how a pathogenic genotypes has been in any way "linked" to phenotypes in ancient individuals. One ancient individual has phenotypes that are common among other ancient individuals, and also carries the deletion/duplication. This is not a result. It just means that the authors were able to genotype an individual for whom they can also measure skeletal traits. I understand that there is some hope that potentially in the long run this sort of paired data can be used to learn more about the relationship between the genotypes and phenotypes of ancient individuals, but this hasn't actually been done here. I think writing that this mutation is not strongly penetrant in this individual is positively misleading. There is no evidence of ANY penetrance or relationship to the phenotype whatsoever.

(I should also note that it is not clear to me whether the the variant of interest in the above section is a deletion or duplication. In line 388, first it is a duplication ("duplications at 16p13.11"), then later in the same line it is a deletion ("An individual harbouring the 16p13.11 deletion"). Maybe there are both? I can't tell...

In general, I think the paper significantly oversells what the results actually tell us about phenotypic variation. The abstract closes with a sentence that begins: "Our results paint a picture of the combined contributions of migration and selection in shaping the phenotypic landscape of present-day Europeans...". But as I've argued above, there is generally little to no evidence linking the reported results to the "phenotypic landscape" of present-day Europeans. For some of these sweeps it is entirely possible that the phenotypes that drove them are not expressed in the modern human environment. The field has been identifying selection signals physically nearby to trait associations for some time now, and that's what most of them still are: two different signals that are close to one



another in the genome but have not other obvious connection. The signals here seem a lot more likely to be "real" than many earlier ones based on iHS or other similar metrics, but the hard work of determining how these sweeps are related to present day phenotypic variation, if at all, lies in the future. To be clear, I think that pointing out nearby phenotypic association or known functions of sweep candidates is fine, but that the overall packaging of the manuscript as if it sheds serious light on this goes too far.

#####

My second major criticism is that the supplement appears incomplete and has many errors and in many places either does not produce enough detail about the methods used, or has text which doesn't fully track.

For example, there is a paragraph starting on line 187 of the supplement that explains why knowing only the first coalescent event is not sufficient for understanding the full ancestry of a given haplotype. While this is no doubt true, this text is not obviously related to the surrounding text. I can surmise that it may be an explanation of why the tool MSMC (which models the first coalescent event and was developed in senior author Richard Durbin's group) isn't an appropriate tool for this task, but MSMC is never explicitly referenced, nor is the "first coalescence event" mentioned anywhere else in the main text or the supplement.

Relatedly, the authors say they adapted CLUES to model time series data. It's hard to tell from the supplemental text whether they've ADDED time series data on top of the existing functionality that uses inferred ARGs (i.e. using aDNA and ARGs jointly), or if it's just that they've taken the CLUES codebase and basically spun off a different (but obviously related) method that uses a time series of aDNA to infer trajectories. The current descriptions in the supplement are extremely cursory, and I think it would be appropriate for the authors to give a more complete description of the methods as actually used.

At line 3050 in supplementary section 2g, the authors write:

"To calculate an ancestry-specific PRS we used an additive model, including a transformation as in Berg & Coop and in line with (Supplementary Note S2c (Allentoft et al. 2022))"

I can't tell what transformation in Berg & Coop they are referring to. I also checked the Allentoft citation and there does not appear to be a section 2c.

Additional pieces of the supplement that still need some work:

Supplementary text 1a switches back and forth between first person singular and first person plural.

Figure S2c.2, it appears the row labels have been removed, presumably by accident.

For Figure S2c.3, the traits are referenced only by their numbers in the "UK Biobank coding system". I think it is not unreasonable for readers to expect a figure with human readable trait labels on it.

For Figure S2c.6, the figure caption reads "Principal component analysis on West Eurasian samples coloured by individual polygenic scores.", but no part of the figure indicates what trait the polygenic scores are for. Searching the text, it seems like it is for height, but this should be clearly indicated in the figure.

Tables S2d.1 S2d.2 and S2d.3 have no figure captions. I can mostly guess at what the column headings are, but readers shouldn't have to. The supplementary text refers to Tables S2d.1 and S2d.2, but there does not appear to be a reference to Table S2d.3 anywhere in the text.

Note that this list is not exhaustive, and I do not think that the authors merely need to respond to the specific examples I point out. Rather, I think the authors need to take a serious pass through the supplement again, including sections that I do not explicitly note here, and make sure that it is actually ready for publication.

#####

Lastly, I have a few comments on the "polygenic selection" analyses relying on polygenic scores:

1) I could not find the actual quantitative results of this analysis. There are figures in the main text that show the traits that pass a bonferroni multiple testing threshold, and figures in the supplement that show a heatmap of some summaries of the analysis (as noted above, however, these figures are not human readable), but readers should have access to the actual results. Relatedly, there is some basic information about the empirical randomization scheme that I could not find: e.g. how many null replicates were sampled to generate the empirical p values?

2) The statement at line 464 that "these analyses help to settle the famous discussion of selection in Europe relating to height" is far too strong. There are at least three potentially distinct signals of selection on height that have been reported in or near Europe. Field et al 2016 reported a signal of recent selection for increased height in Britain within the last 2000 years, based on analyses using the singleton density score (Howe et al 2022 also supported this result using sibling based effect sizes which are free of confounding). There is also a reported signal of selection for decreased height in Sardinia, supported by effect sizes from the Biobank of Japan (Chen et al 2020). Then, there is the signal that's being reported here, which is similar to one reported by Mathieson et al 2015. I think the authors should be clearer about the broader context and complex history of this particular question.

## Author Rebuttals to Initial Comments:

84 *Referee expertise:*

85

86 *Referee #1: human evolutionary genetics*

87

88 *Referee #2: aDNA/human evolution*

89

90 *Referee #3: population genetics*

91

92 *Referees' comments:*

93 *Referee #1 (Remarks to the Author):*

94

95 *This manuscript integrates several hundred new ancient human DNA samples along*  
96 *with previous human aDNA data to build a dataset of ~1600 imputed ancient*  
97 *genomes. It then applies several new computational methods for the inference of*  
98 *admixture proportions and allele frequency changes suggestive of selection. A major*  
99 *strength of the approach is the ability to control for differences in ancestral background*  
100 *in ancient and modern samples. The resulting catalog of evolutionary pressures on*  
101 *European phenotypes over that past 12,000 years suggests that ancient selection and*  
102 *admixture have played a larger role in modern phenotypes than recent local selection.*

103

104 **Response:** We thank the reviewer for their constructive feedback, and agree that the  
105 ancestral path decomposition represents a major strength of the paper. We have since  
106 made modifications and improvements to the novel chromosome painting model, to  
107 increase the accuracy of the inference.

108 *Major Comments:*

109

110 *The two paragraphs from lines 123-153 describe the data and fundamental analytic*  
111 *methods used in this study, and as such, they are essential to the plausibility and*  
112 *interpretation of all subsequent results. These approaches include several predictive*  
113 *analyses that integrate new methods and data from this manuscript with recently*  
114 *published methods. While I appreciate the length constraints, extensive*  
115 *supplementary material, and desire to get to the results quickly, more detail on these*  
116 *methods (especially their accuracy and validation) must be provided in the main text.*

117

118 **Response:** We agree that length constraints in the main text make it difficult to  
119 provide a complete justification for all of the methods used in the paper; however, we  
120 have added additional details and citations to the manuscript to address these  
121 concerns (detailed below).

122

123 *To illustrate this, here are some of the new claims the reader is asked to accept in*  
124 *these paragraphs without any details in main text (and this is assuming that existing*  
125 *methods like RELATE and CLUES are sufficiently accurate):*

126

127 *- The ancient genomes are accurately imputed and phased.*

128

129 **Response:** We have prepared a new paper which provides comprehensive validation  
130 and benchmarking of the imputation and phasing of the ancient samples used in this  
131 manuscript (da Mota et al. 2022 *bioRxiv*; <https://doi.org/10.1101/2022.07.19.500636>).  
132 The validation of the imputation accuracy is performed using 42 down-sampled high-  
133 coverage ancient genomes, and the validation of the phasing accuracy is performed  
134 using the first ever ancient human trio. For a 1x ancient genome, we estimate an  
135 imputation error rate of 1.9% and a phasing switch error rate of 2.0%, which is  
136 comparable to modern genomes at equivalent coverage.

137  
138 **Changes:** We have updated the main text to cite the new preprint, and have added  
139 the following summary text.

140  
141 lines 130-133:

142       This dataset comprises 1,664 imputed diploid ancient genomes and more than  
143       8.5 million SNPs, with an estimated imputation error rate of 1.9% and a  
144       phasing switch error rate of 2.0% for 1X genomes. Full details of the validation  
145       and benchmarking of the imputation and phasing of this dataset are provided in  
146       reference (da Mota et al. 2022).

- 147  
148 - *The new chromosome painting ancestry inference method is accurate at the*  
149 *haplotype level on both ancient and modern genomes.*  
150 - *The simulation framework is not sensitive to misspecification/inaccuracies in the four-*  
151 *population admixture model.*  
152 - *The neural network classifier for ancestral path inference is sufficiently accurate.*

153  
154 **Response:** We have prepared a second additional paper which comprehensively  
155 describes the validation and benchmarking of an improved version of the novel  
156 chromosome painting method used in our updated aDNA time-series analyses  
157 (Pearson & Durbin 2023 *bioRxiv*; <https://doi.org/10.1101/2023.03.06.529121>). In this  
158 paper we show that our method outperforms a leading alternative, *GNOmix*  
159 (Hilmarrsson et al. 2021 *bioRxiv*; <https://doi.org/10.1101/2021.09.19.460980>), under  
160 most tested scenarios. Using simulations, we estimate an average accuracy of 94.6%  
161 for the four ancestral paths leading to present-day Europeans. We also show that our  
162 method is robust to a range of simulated demographic scenarios and model  
163 misspecification.

164  
165 **Changes:** We have updated the main text to cite the new preprint, and have added  
166 the following summary text.

167  
168 lines 210-213:

169       Using simulations, we show that our novel chromosome painting method has  
170       an average accuracy of 94.6% for the four ancestral paths leading to present-  
171       day Europeans, and is robust to model misspecification. Details of the novel  
172       chromosome painting method used on this dataset are provided in  
173       Supplementary Note 1c, and further described in reference (Pearson and  
174       Durbin 2023).

175

176 - *The updates to the CLUES framework enable accurate allele frequency and*  
177 *selection coefficient estimates.*

178

179 **Changes:** To validate the accuracy of the updates to the CLUES method, we have  
180 performed a set of new simulations. These simulations show that CLUES accurately  
181 infers selection coefficients and allele frequency trajectories for sample sizes smaller  
182 than those we used in our empirical analyses. We have also updated the way we  
183 convert the log-likelihood ratio statistic into a p-value, which has increased our power  
184 to detect SNPs under selection. Full details of the simulation design and  
185 benchmarking accuracy are described in Supplementary Note 2b.

186

187 *(Big kudos for the snakemake and clear github page.)*

188

189 **Response:** We believe that open and reproducible methods are critical to the  
190 advancement of science, and thank the reviewer for their acknowledgement.

191

192 **Changes:** We have added additional URLs for the chromosome painting and ARS  
193 analysis of the UK Biobank, the implementation of the novel chromosome painting  
194 method and for the demographic model used to train the classifier.

195

196 lines 616-622:

197 The scripts used to run the chromosome painting (Supplementary Note 1b)  
198 and calculate ARS in the UK Biobank (Supplementary Note 2f) are available at  
199 [https://github.com/will-camb/mesoneo\\_selection\\_paper](https://github.com/will-camb/mesoneo_selection_paper). The software to  
200 perform the ancestral path chromosome painting described in Supplementary  
201 Note 1c is available on GitHub at [https://github.com/AliPearson/](https://github.com/AliPearson/AncestralPaths)  
202 [AncestralPaths](https://github.com/AliPearson/AncestralPaths), and the demographic model is available in the stdpopsim  
203 library (see [https://popsim-consortium.github.io/stdpopsim-docs/stable/](https://popsim-consortium.github.io/stdpopsim-docs/stable/catalog.html#sec_catalog_homsap_models_ancienteurope_4a21)  
204 [catalog.html#sec\\_catalog\\_homsap\\_models\\_ancienteurope\\_4a21](https://popsim-consortium.github.io/stdpopsim-docs/stable/catalog.html#sec_catalog_homsap_models_ancienteurope_4a21)).

205

206 - *The control set of SNPs is appropriate.*

207

208 **Response:** The selection process for the control SNPs is detailed in Supplementary  
209 Note 2a. Control SNPs were ascertained by selecting all biallelic SNPs within the  
210 imputed dataset and excluding any that fell within +/- 50 kb of a GWAS SNP or a gene  
211 region. Control SNPs were grouped into bins based on their derived allele frequency  
212 (DAF), rounded to the nearest 1%, and paired randomly (without replacement) with  
213 GWAS SNPs in the same chromosome and DAF bin.

214

215 Note: we respond to the query about LD pairing below.

216

217 **Changes:** We have updated the main text to cross-reference the relevant chapter in  
218 the supplement.

219

220 lines 223-224:

221 An equal number of putatively neutral, frequency-paired variants were used as  
222 a control set (Supplementary Note 2a).

223

224 *I found these approaches to generally be reasonable and the details in the*  
225 *supplementary material to be helpful, but the evaluation was often lacking. To illustrate*  
226 *this, I provide a few non-exhaustive examples where more validation/justification are*  
227 *needed.*

228

229 **Changes:** We have revised the supplement to improve clarity, and have added  
230 additional analyses, including a validation of the revised CLUES method  
231 (Supplementary Note 2b). We now also cite two additional papers, which  
232 systematically validate and benchmark the imputation pipeline and the novel  
233 chromosome painting method (detailed below).

234

235 *In the section on the neural network to predict paths backward in time (S1a), the only*  
236 *evaluation provided is the confusion matrix on simulated data in Figure S1a.2. It*  
237 *seems that there is considerable misclassification even on the simulated data.*  
238 *(However, I note that there is not a scale bar, so I can't really evaluate the magnitude*  
239 *of the values in each box.)*

240

241 **Changes:** We apologise for the error in the confusion matrix and have replaced this  
242 figure in the supplement with a more detailed breakdown of the classification  
243 accuracy, showing confusion matrices for five different simulated populations. We  
244 have also updated the manuscript to use a revised and improved version of the  
245 chromosome painting model, which now has an average accuracy of 94.6% for the  
246 four ancestral paths leading to present-day Europeans.

247

248 *In S2b, there is no evaluation of the method for inferring allele frequency changes*  
249 *influenced by bias. And there is not a justification for the 0.5 threshold on  $F_j$ . Out of*  
250 *the context of the distribution of this metric across sites or its effect on the likelihood of*  
251 *inferring selection, this still seems quite low. Similarly in the most of the supplementary*  
252 *sections I did not find the level of evaluation I expected.*

253

254 **Changes:** We have expanded the discussion in the supplement justifying the choice  
255 of threshold for the  $F_j$  statistic, and added simulations which show that the  $F_j$  statistic  
256 is well calibrated to detect problematic SNPs (see Figure S2c.2).

257

258 lines 2932-2948 (Supplement):

259 The distribution of  $F_j$  can be divided into 3 parts, the region  $F_j < 0$ , maps back to  
260  $-1 < R_j < 0$ , the region  $0 < F_j \leq 1$  maps back to  $R_j > 0$ , and the region  $F_j > 1$  maps  
261 back to  $R_j < -1$ . When filtering sites we exclude those sites where the indirect  
262 and direct impacts have the same direction, making it impossible to  
263 differentiate between the two, i.e.,  $R_j > 0$ . Therefore when the filtering is based  
264 on  $F_j$  values, we only filter the sites with  $F_j$  values within  $0 < F_j \leq 1$ . When  $F_j$  the  
265 value is closer to 1, it becomes harder to distinguish the confounding signal  
266 from the true temporal signal (e.g., selection), so we use a cutoff  $c$  to remove  
267 the SNPs where it is unworkable to differentiate them. The value of  $F_j$  is used  
268 to keep the sites which we believe to be under (relatively large) selection and  
269 screen the rest, while the numerator and denominator of  $R_j$ , as they reflect the  
270 absolute strengths of the temporal and confounding signals, are more suitable

271 for detecting unknown selection signals upon sites. To filter out sites in  
272 selection analyses that may be affected by biases, we use a fixed threshold of  
273  $0.5 < F_j \leq 1$ . Choosing a filtering threshold of  $F_j$  values above empirical threshold  
274 0.5 removes those sites where indirect effects mediated through the ancient  
275 DNA characteristics (biases caused by ancient characteristics) are greater than  
276 the true change of allele frequency measured as the direct effect. Their change  
277 of frequencies are more likely caused by ancient signals rather than selections.

278  
279 *Following on this, the bigger point is that it is challenging to evaluate the sensitivity of*  
280 *the results to inaccuracies in each of the modeling and predictive steps listed above.*  
281 *Given that the results of one analysis are often used as inputs to the next, I fear the*  
282 *potential for errors and propagation. Anything the authors can do to better understand*  
283 *this would be extremely valuable in establishing confidence in the results.*

284  
285 **Response:** To build confidence in the robustness of our analyses, we have performed  
286 additional benchmarking and validation for the phasing and imputation (da Mota et al.  
287 2022 *bioRxiv*; <https://doi.org/10.1101/2022.07.19.500636>), the ancestral path  
288 chromosome painting (Pearson & Durbin 2023 *bioRxiv*;  
289 <https://doi.org/10.1101/2023.03.06.529121>), and the inference of allele frequency  
290 trajectories and selection coefficients using the modified version of CLUES  
291 (Supplementary Note 2b). These new analyses show that the overall rate of error in  
292 each analysis step is low and that accuracy outperforms comparable approaches.  
293 Furthermore, to mitigate the potential of bias caused by the propagation of errors from  
294 one analysis step to another, we have implemented several additional controls.

295  
296 To test for potential effects of imputation bias on our selection analyses, we ran  
297 additional models for each of the top SNPs in the pan-ancestry analysis, using  
298 genotype likelihoods (GL) called directly from the aDNA sequencing reads. Because  
299 our chromosome painting model requires phased haplotypes, this replication test was  
300 limited to pan-ancestry models only. When comparing the imputed and GL selection  
301 models, we observed that the posterior likelihood densities of the allele frequency  
302 trajectories are highly correlated, as are the selection coefficients. Due to the smaller  
303 sample sizes in the GL callset we had less power to reject neutrality, and the inferred  
304 log-likelihood ratio test statistics were consistently lower than in the imputed models,  
305 but all remained high. Overall, we did not detect any substantive bias when comparing  
306 these two sets of models.

307  
308 To test for potential effects of painting bias on our selection analyses, we performed  
309 neutral simulations using the same demographic model used to train the classifier  
310 (Supplementary Note 2a). We applied the chromosome painting model to the  
311 simulated VCF, and used CLUES to infer allele frequency trajectories and selection  
312 coefficients for frequency paired simulated SNPs, in both a pan-ancestry analysis and  
313 stratified by each of the four ancestral paths. We then applied the same thresholds  
314 used in the empirical analysis to detect selective sweep loci. We observed zero  
315 genome-wide significant selective sweep loci across all five analyses. At a SNP level  
316 we observed 22 false-positive SNPs (0.75%) across all analyses (Supplementary  
317 Figure S2a.26). Due to the stochastic occurrence of false-positive SNPs along the  
318 chromosome, no false-positive sweep loci were detected. Detection of a false-positive



319 sweep locus would require a cluster of at least 6 genome-wide significant SNPs within  
320 a +/- 1 Mb locus. From this analysis we conclude that the low rate of error in our  
321 chromosome painting model is unlikely to bias the inference of sweep loci, but may  
322 produce a small number of randomly occurring false-positive SNPs.

323

324 To control for errors specific to ancient DNA damage, we developed two new quality-  
325 control metrics for filtering sites with evidence of potential bias. Firstly, we developed a  
326 novel statistic ( $F_3$ ) for detecting correlations between characteristics of aDNA damage  
327 (i.e., depth of coverage, read length and error rate) and changes in allele frequencies  
328 over time (Supplementary Note 2c). The purpose of the  $F_3$  statistic is to identify SNPs  
329 where the observed time-series of aDNA genotypes may be biased by age  
330 dependent preservation characteristics. We also developed a second metric, intended  
331 to detect reference and mapping bias when analysing ancient and modern DNA  
332 together (Supplementary Note 2a). Due to the characteristics of aDNA damage, some  
333 sites may be enriched for mapping bias, which favours observations of the reference  
334 allele. This can result in systematic differences between allele frequencies calculated  
335 from aDNA and modern data. To control for this, we developed a test to filter out sites  
336 exhibiting substantial differences between present-day allele frequencies inferred from  
337 ancient and modern data respectively.

338

339 Finally, to test for potential effects from unmodeled phenomena, we ascertained a set  
340 of putatively neutral "control" SNPs. These SNPs were drawn at random from regions  
341 of the genome at least 50 kb from a GWAS SNP or gene region, and frequency paired  
342 with each GWAS SNP based on their derived allele frequency (DAF). We then ran the  
343 Control SNPs through the same selection pipeline as the GWAS SNPs. Our ancestry  
344 stratified results detected 19 genome-wide significant selective sweeps in the GWAS  
345 group, and 2 in the Control group. Upon further investigation, one of the two sweeps  
346 identified in the Control group (chr19:57.5-57.5 Mb) contains genome-wide significant  
347 SNPs that were not reported in the GWAS Catalog, but are reported in the UK  
348 Biobank (i.e., rs959939, rs2102540, rs56830277 and rs12978492 for phenotype code  
349 '20024\_1121'). Interpretation of the remaining sweep is less clear, as it is entirely  
350 possible that a non-GWAS locus may be a target of selection. Overall, these results  
351 indicate that error propagation between analysis steps is not a major source of bias,  
352 as the Control SNPs are themselves subject to the same phasing, imputation, painting  
353 and selection analyses as the GWAS SNPs and yet we find a 20-to-1 ratio of sweep  
354 loci that contain significant GWAS trait associations.

355

356 **Changes:** We have added citations in the main text to the two new manuscripts which  
357 describe the validation and benchmarking of our imputation and chromosome painting  
358 approaches in more detail. We have also added a new chapter to the supplement  
359 detailing a comprehensive set of simulations to benchmark the modifications to our  
360 CLUES method (Supplementary Note 2b).

361

362 *I appreciated the comparison to the control group in the GWAS variant selection*  
363 *analyses, but I have two questions about this. First, isn't it important to match the*  
364 *control SNPs on LD as well as MAF, since it is likely associated both with the*



365 *probability that a variant is a GWAS hit and experienced selection? This is commonly*  
366 *done in tools like SNPSNAP.*

367

368 **Response:** When conducting an enrichment analysis for a genome-wide association  
369 study it is important to pair SNPs using linkage disequilibrium to properly calibrate  
370 background expectations. However, our use-case for ascertaining a set of control  
371 SNPs is different, as we are specifically looking for evidence of selection, rather than  
372 evidence of enrichment for particular biological annotations. We chose not to pair our  
373 control SNPs using the flanking patterns of LD because the strength and extent of LD  
374 is directly influenced by selection (i.e., LD is a dependent variable in many selection  
375 tests). Our concern is that if we LD-paired our control SNPs we would be enriching for  
376 sites with evidence of selection, due to the high occurrence of selection in the GWAS  
377 set.

378

379 *Second, the finding of many more selection peaks when conditioning on ancestry is*  
380 *interesting. However, there was not any evaluation via simulations of the power to*  
381 *detect different types of selective events when considering ancestry or not. Couldn't*  
382 *this just be due to an increase in power when considering ancestry?*

383

384 **Response:** Our analysis suggests that there are several reasons why we detect more  
385 selection when conditioning on ancestry; one of which is increased statistical power. In  
386 cases where the selected allele is not segregating in all ancestral backgrounds (e.g., if  
387 it is private to one ancestral path), stratification by ancestry increases our statistical  
388 power to detect selection, as it allows us to separate haplotypes in which the selected  
389 allele is absent (i.e., where selection can have no observable effect). Similarly, in  
390 cases where selection is influenced by epistasis, stratification by ancestry may allow  
391 us to separate haplotypes that contain only a subset of the adaptive markers.

392

393 However, the main reason we detect more selection is due to the effects of multiple  
394 waves of admixture. Our pan-ancestry analysis spans three major waves of admixture  
395 (Figure 3), which coincide with dramatic changes in subsistence strategy, as well as  
396 large movements of people into new environmental niches. In cases where selection is  
397 acting in only one population, admixture can confound analyses based on time-series  
398 data, especially when the admixing populations have substantially different allele  
399 frequencies. Stratifying by ancestry controls for this effect, as it allows us to model  
400 changes in allele frequency independently of changes in admixture fraction.

401

402 *Given the challenges of porting polygenic risk scores across even closely related*  
403 *populations, I was very surprised to see the attempts at PRS-based ancestral trait*  
404 *reconstruction. The authors are aware of these challenges and repeatedly suggest*  
405 *“caution” in the interpretation. This is insufficient as no work has been done to*  
406 *evaluate the feasibility or accuracy of this analysis. Given the known challenges and*  
407 *lack of specific hypotheses guiding these analyses, their value to the manuscript is not*  
408 *clear. I would suggest removing these if stronger justification cannot be provided.*  
409 *(Also, PMID: 29285967 should be cited.)*

410

411 **Response:** We have accepted this recommendation, and removed the PRS-based  
412 trait reconstruction analyses from the manuscript. Whilst some simulation studies have

413 been published on this topic (Carlson et al. 2022 *PLOS Genetics*;  
414 <https://doi.org/10.1371/journal.pgen.1010170>; Yair & Coop 2022 *Proc. R. Soc. B*;  
415 <https://doi.org/10.1098/rstb.2020.0416>), and two papers have attempted empirical  
416 validation (Cox et al. 2021 *AJPA*; <https://doi.org/10.1002/ajpa.24426>; Marciniak et al.  
417 2022 *PNAS*; <https://doi.org/10.1073/pnas.2106743119>), we agree that additional  
418 simulations would be beneficial for estimating the loss of predictive accuracy in  
419 populations that are only partially ancestral to the GWAS cohort. However, a new  
420 simulation study is outside the scope of this already large manuscript, so we have  
421 elected to remove this analysis instead.

422

423 **Changes:** We have updated the main text to remove these results and have deleted  
424 the Supplementary Notes titled “Over-dispersion in polygenic scores across ancient  
425 populations” and “Correlation between components of variation in population structure  
426 and components of variation in SNP-trait association”.

427

428 *That said, the estimation of the contributions of different ancestral populations to*  
429 *variation in phenotypes in the UK Biobank seems on stronger methodological footing.*  
430 *However, these results are not presented in any detail except to say that they point to*  
431 *a way forward for disentangling ancestry contributions to differences in genetic*  
432 *disease risk (L460). I suggest expanding the presentation of these results instead of*  
433 *the ancient phenotype prediction.*

434

435 **Response:** We agree that the ancestral risk scores calculated from the chromosome  
436 painting of the UK Biobank provides a robust estimate of the phenotypic legacy of  
437 these ancestral populations, as it avoids the issue of portability when directly  
438 predicting polygenic scores in ancient individuals.

439

440 **Changes:** We have greatly expanded the presentation of these results in the main  
441 text, under the subheading “The phenotypic legacy of ancient Eurasians” on line 497.

442

443 *I would also like to see more direct discussion of how the results relate to those of a*  
444 *few recent similar studies. For example:*

445 *doi: <https://doi.org/10.1101/2022.07.02.498543> and*

446 *<https://doi.org/10.1101/2022.08.24.505188> both have traced selection over the past*  
447 *10,000 years using different methods.*

448 *PMID: 36316412 argued that admixture can hide selective events.*

449

450 **Response:** We did not cite the papers by either Lee et al. (2022 *bioRxiv*;  
451 <https://doi.org/10.1101/2022.08.24.505188>) or Kerner et al. (2023 *Cell Genomics*;  
452 <https://doi.org/10.1016/j.xgen.2022.100248>) in the previous version of our manuscript  
453 because both these papers post-date our initial submission in May 2022 (prior to the  
454 splitting up of the original manuscript into more focused papers). In both cases, it is  
455 difficult to directly compare our results, due to substantial differences in methodology,  
456 sampling and reporting.

457

458 Lee et al. (2022) used pseudohaploid data from the 1240k capture array, so their true  
459 sample size (measured in count of genotypes) is considerably less than their reported  
460 1,291 individuals, which they further subdivide into three time periods. For example, in

461 our analysis of selection at the LCT locus using the 1240k dataset (Supplementary  
462 Figure S2a.56), we observed that there were 838 pseudohaploid calls for rs4988235,  
463 but only 476 for rs1438307, when using the same 1,291 samples as Lee et al. (2022).  
464 We explicitly chose not to subdivide our selection scan of 1,015 diploid ancient  
465 genomes into multiple epochs, due to the risk of overfitting to small sample sizes. The  
466 Let et al. selection scan is an updated version of the mixture model used in Mathieson  
467 et al. (2015, *Nature*; <https://doi.org/10.1038/nature16152>) which relies on differences  
468 in allele frequencies postdating admixture. As such, they are best powered to detect  
469 rapid episodes of selection following admixture between populations with large  
470 differences in allele frequencies. In our analyses, we used local ancestry inference to  
471 identify selection signals in a manner that is independent of changes in admixture  
472 proportions, so we are well-powered to detect selection in a much broader range of  
473 demographic scenarios. We also have reservations about the use of the 1240k  
474 capture array data to detect selection, due to well-established allelic bias caused by  
475 the capture chemistry (Rohland et al., *bioRxiv*;  
476 <https://doi.org/10.1101/2022.01.13.476259>).

477  
478 Kerner et al. (2023) also used pseudohaploid data from the 1240k capture array, but  
479 they took additional quality control steps to filter their results based on a comparison to  
480 shotgun sequenced data. Strikingly they found that nine of the top 10 variants in their  
481 capture dataset had a frequency trajectory inconsistent with their shotgun dataset;  
482 indicating systematic problems with using 1240k capture data for selection scans. We  
483 also note that the selection test used by Kerner et al. (2023) is based on choosing  
484 variants with an estimated selection coefficient above the 99th quantile from their  
485 simulations, and is therefore only powered to detect cases of extremely high selection.  
486 One of the novel findings from our study is that when you characterise a locus based  
487 on the SNP with the most extreme divergence from neutrality (e.g., rs4988235 at the  
488 LCT locus) you can easily overlook a much longer history of selection at that locus.

489

490 **Changes:** We have added a citation to PMID 36316412.

491

492 lines 245-247:

493       This suggests that admixture between ancestral populations has masked  
494       evidence of selection at many trait associated loci in Eurasian populations  
495       (Souilmi et al. 2022).

496 *Minor Comments:*

497

498 *While I appreciate that the details of the construction of the cohort are provided in a*  
499 *companion paper, a few more sentences and perhaps a figure panel describing the*  
500 *geographic locations and ages would be helpful.*

501

502 **Changes:** We have added a new Figure 1, which shows sampling locations and ages  
503 of the West Eurasian samples used in our aDNA time-series selection analysis, as  
504 well as five density plots of the sample ages, grouped by sampling region.

505

506 *Tone down exaggerated statements. For example, on L111 and L119, is this dataset*  
507 *truly “unprecedented”?* *While this is a wonderful dataset, by now many studies have*  
508 *analyzed hundreds of ancient individuals’ genomes. Thus, I disagree that it is*  
509 *unprecedented.*

510

511 **Changes:** We have removed all usage of the word “unprecedented”

512

513 lines 128-130:

514 Our analyses are undertaken on the largest collection of shotgun-sequenced  
515 ancient genomes published to date; presented in the accompanying study  
516 ‘Population Genomics of Stone Age Eurasia’ (Allentoft et al. 2022).

517

518 lines 139-141:

519 This dataset allows us to characterise in fine detail the changes in selective  
520 pressures exerted by major transitions in human culture and environment.

521

522 lines: 435-438

523 Additionally, our results provide detailed information about the duration and  
524 geographic spread of these processes (Fig. 4) suggesting that an allele  
525 associated with lighter skin was selected for repeatedly, probably as a  
526 consequence of similar environmental pressures occurring at different times in  
527 different regions.

528

529 *Similarly, I thought the insights into the timing and different variants potentially*  
530 *involved in selection at the LCT/MCM6 locus were fascinating. But it is not clear to me*  
531 *that this analysis will completely settle the “controversies regarding the timing of this*  
532 *selection” on lactose digestion (L172).*

533

534 **Response:** To support our novel result that a microRNA variant near the LCT locus  
535 has been under selection for thousands of years prior to the emergence of the lactase  
536 persistence allele we replicated our analysis using genotypes from the 1240k capture  
537 array, downloaded from v52.2 of the Allen Ancient DNA Resource. We limited our  
538 analysis to the 1,291 West Eurasian samples used by Le et al. (2022 *bioRxiv*;  
539 <https://doi.org/10.1101/2022.08.24.505188>), and binned genotypes into one-thousand-  
540 year bins, then plotted a weighted loess regression (Supplementary Figure S2a.56.).  
541 This analysis independently replicates our finding of earlier selection at the microRNA  
542 variant, using a different set of samples, genotyped with a different sequencing  
543 technology, and without relying on either imputation or chromosome painting.

544

545 **Changes:** We have reworded the main text to remove the claim that our results settle  
546 the controversies of the timing of this selection.

547

548 lines 250-252:

549 We find strong changes in selection associated with lactose digestion after the  
550 introduction of farming, but prior to the expansion of the Steppe pastoralists  
551 into Europe around 5,000 years ago (Allentoft et al. 2015; Haak et al. 2015),  
552 the timing of which is a long standing controversy (Enattah et al. 2008; Itan et  
553 al. 2009; Ségurel and Bon 2017; Segurel et al. 2020).

554  
555  
556  
557  
558  
559  
560  
561  
562  
563  
564  
565  
566  
567  
568  
569  
570  
571  
572  
573  
574  
575  
576  
577  
578  
579  
580  
581  
582  
583  
584  
585  
586  
587  
588  
589  
590  
591  
592  
593  
594  
595  
596  
597  
598  
599  
600  
601

*And again, in the discussion of height and selection (L464-470), this study adds valuable new data and hypotheses, but I am not convinced that it is “settled” (and I don’t have a stake in this debate) so I would reframe this section*

**Changes:** We have reworded this sentence.

lines 554-559:

These results also help to clarify the famous discussion of selection in Europe relating to height (Mathieson et al. 2015; Cox et al. 2019; Rosenstock et al. 2019). Our finding that the ‘Steppe’ ancestral components (Yamnaya/EHG) have consistently high genetic values for height in the UK Biobank demonstrates that height differences between Northern and Southern Europe may be a consequence of differential ancestry, rather than selection, as claimed in many previous studies (Field et al. 2016). However, our results do not preclude the possibility that height has been selected for in specific populations (Chen et al. 2020; Howe et al. 2022).

*The sweep “loci” seem extreme large from several of the examples given: multiple Mb for most and 33 Mb for HLA. Can the authors comment on whether this is a resolution issue or likely to reflect selection on multiple variants within these windows (as would be expected for a locus like the HLA)?*

**Response:** Regarding the reported sizes of the sweep loci, we have changed the way that these are calculated, and now report smaller loci for the majority of the sweeps. Previously we were using the software Manhattan Harvester (Haller et al. 2019 *BMC Bioinformatics*; <https://doi.org/10.1186/s12859-019-2600-4>), which was reporting the very wide loci. We have now updated our approach to use a hierarchical clustering algorithm, with a maximum branch length of 1Mb. This results in more compact loci, but with fewer genome-wide significant SNPs (Supplementary Note 2a).

In the case of the HLA, our results indicate that this locus has been subject to multiple independent sweeps, occurring at different times and with differing intensities (line: 326). We further explore the complex pattern of ancestry specific selection at the HLA in our companion paper, “Elevated genetic risk for Multiple Sclerosis originated in Steppe Pastoralist populations” (Barrie et al. 2022 *bioRxiv*; <https://doi.org/10.1101/2022.09.23.509097>). In that paper, we show that polygenic selection at the HLA locus has increased genetic risk for multiple sclerosis and reduced genetic risk for rheumatoid arthritis. These polygenic selection signals are principally centred around the HLA locus, are independent of each other, and occur at strikingly different times over the last 13,000 years.

Our results also suggest that multiple targets of selection are more common in genome-wide sweep loci than previously thought. We observe multiple cases where the most significant SNP in a sweep locus varies between ancestral backgrounds, consistent with selection favouring more than one haplotype (although small differences could also be attributed to error in the painting model). We further observe that sweep loci shared across ancestries are often only partially overlapping. For the



602 ancestry stratified analysis, the reported boundaries of each sweep locus is obtained  
603 by merging overlapping loci inferred in each marginal ancestry. As such, flanking  
604 regions of these merged loci may only be genome-wide significant in a subset of the  
605 ancestries where we detect that sweep. Lastly, we also detect cases where the  
606 inferred timing of selection differs substantially among genome-wide significant SNPs  
607 within the locus (e.g., the lactase persistence allele and the microRNA variant  
608 discussed in the main text).

609  
610 **Changes:** We have updated the main text to report the smaller sweep loci, and have  
611 added the following citation to our new preprint.

612

613 lines 349-351:

614 We further explore the complex pattern of ancestry specific selection at the  
615 HLA locus in our companion paper, “Elevated genetic risk for Multiple Sclerosis  
616 originated in Steppe Pastoralist populations” (Barrie et al. 2022).

617

618 *At several points a “population structure axis separating” populations is referred to with*  
619 *a reference to Figure 2. I believe that this is in error. Perhaps it should be Figure 4A?*  
620 *Also, the variance explained by the PCs is incredibly small.*

621

622 **Changes:** We have removed this passage of text and Figure 4A.

623

624 *Figure 1: I do not see a blue line for pop\_4. But perhaps it is not supposed to appear*  
625 *since the numbering starts with 0?*

626

627 **Changes:** We have updated this figure with a new version that reflects the updated  
628 model used in our revised manuscript.

629

630 *I suspect that this is a PDF conversion issue, but all the figures are blurry.*

631

632 **Response:** The blurriness of the figures was caused by a PDF conversion issue  
633 during the upload to the submission system. All figures in the submitted version were  
634 of high resolution.

635

636 *Referee #2 (Remarks to the Author):*

637

638 *Irving-Pease et al. report analysis searching for natural selection in a large set of*  
639 *>1,600 imputed shotgun genomes, many of which were produced in a "main paper"*  
640 *(Allentoft et al.) to which this paper is a companion paper. They take approaches*  
641 *including inference of selection coefficients on genealogies, decomposition of*  
642 *evolution in different ancestral populations, evolution of polygenic traits and evidence*  
643 *for adaptation on those, and searching for structural variants with evidence of*  
644 *pathogenicity.*

645

646 *The paper is well-written, and several approaches and analysis here are highly*  
647 *interesting and definitely push the field of studying natural selection with ancient DNA*  
648 *forward (for example, the ancestry-decomposed inference of selection coefficients),*  
649 *but it is less clear which new biological insights are learned, and there are several*  
650 *issues that need mention and clarification.*

651

652 **Response:** We thank the reviewer for their assessment that our paper is highly  
653 interesting and pushes the field forward. To clarify which new biological insights have  
654 been learned, we have made several changes to the main text (detailed below).

655

656 *The paper consists of hundreds, perhaps thousands, of claims of selection on single*  
657 *variants and traits, each caveated largely appropriately, but the study is thus different*  
658 *from most papers focusing on presenting tight waterproof evidence for a handful of*  
659 *central claims. Reading the paper, I can see a few claims that I am guessing that the*  
660 *authors are highly confident in, but also others where I am unsure of what level of*  
661 *confidence there actually is.*

662

663 *Of the major claims in the abstract:*

664 *-Selection on metabolism, and HLA seems to have been reported previously (e.g.*  
665 *Mathieson et al. 2015, Nature). The link between immune selection and autoimmune*  
666 *disease is entirely speculation, no new advance on the possible link is reported.*

667

668 **Response:** We have prepared a new companion paper titled "Elevated genetic risk for  
669 Multiple Sclerosis originated in Steppe Pastoralist populations" (Barrie et al. 2022  
670 *bioRxiv*; <https://doi.org/10.1101/2022.09.23.509097>), in which we formally test for  
671 polygenic selection for two autoimmune diseases. In that paper, we show that  
672 statistically significant polygenic selection at the HLA locus has increased genetic risk  
673 for multiple sclerosis and reduced genetic risk for rheumatoid arthritis. These  
674 polygenic selection signals are principally centred around the HLA locus, are  
675 independent of each other, happen at strikingly different times over the last 13,000  
676 years, and occur on different ancestral backgrounds.

677

678 Regarding the metabolism results, we report two major advances. Firstly, we show  
679 that at the FADS locus much of the selection associated with a more vegetarian diet  
680 occurred in Neolithic populations before they arrived in Europe, then continued during  
681 the Neolithic, contrary to previous reports. Secondly, at the LCT locus we show that  
682 selection predates the emergence of the lactase persistence (LP) allele by thousands

683 of years, and appears to be favouring a microRNA variant (rs1438307) with strikingly  
684 different metabolic effects. We further show that the high LD between the LP allele  
685 and the microRNA variant may explain the recently observed correlation between  
686 frequency rises in the LP allele and archaeological proxies for famine and increased  
687 pathogen exposure (Evershed et al. 2022; *Nature*; [https://doi.org/10.1038/s41586-](https://doi.org/10.1038/s41586-022-05010-7)  
688 [022-05010-7](https://doi.org/10.1038/s41586-022-05010-7)).

689  
690 **Changes:** We have updated the main text to cite our new preprint, and have reworded  
691 the results in this manuscript to make it clearer when we are hypothesising about a  
692 connection to autoimmune disease.

693  
694 lines 349-351:

695 We further explore the complex pattern of ancestry specific selection at the  
696 HLA locus in our companion paper, "Elevated genetic risk for Multiple Sclerosis  
697 originated in Steppe Pastoralist populations" (Barrie et al. 2022).

698  
699 *-Selection at the FADS cluster and the lactase persistence locus began earlier than*  
700 *previously thought. This seems like novel claims, and the evidence seems strong. At*  
701 *the same time, saying that the debate is "settled" is probably premature. This claim*  
702 *could be supported by additional evidence, how robust is the new timing proposed by*  
703 *the authors, and exactly what timings had been suggested before?*

704  
705 **Response:** To support our novel result that a microRNA variant near the LCT locus  
706 has been under selection for thousands of years prior to the emergence of the lactase  
707 persistence allele we replicated our analysis using genotypes from the 1240k capture  
708 array, downloaded from v52.2 of the Allen Ancient DNA Resource. We limited our  
709 analysis to the 1,291 West Eurasian samples used by Le et al. (2022 *bioRxiv*;  
710 <https://doi.org/10.1101/2022.08.24.505188>), and binned genotypes into one-thousand-  
711 year bins, then plotted a weighted loess regression (Supplementary Figure S2a.56.).  
712 This analysis independently replicates our finding of earlier selection at the microRNA  
713 variant, using a different set of samples, genotyped with a different sequencing  
714 technology, and without relying on either imputation or chromosome painting.

715  
716 **Changes:** We have reworded the main text to remove the claim that our results settle  
717 the controversies of the timing of this selection.

718  
719 lines 250-252:

720 We find strong changes in selection associated with lactose digestion after the  
721 introduction of farming, but prior to the expansion of the Steppe pastoralists  
722 into Europe around 5,000 years ago (Allentoft et al. 2015; Haak et al. 2015),  
723 the timing of which is a long standing controversy (Enattah et al. 2008; Itan et  
724 al. 2009; Séguérel and Bon 2017; Segurel et al. 2020).

725  
726 *--Differential genetic contributions in height ancestral to present-day Europeans.*  
727 *Yamnaya introduced tall height. This seems largely in line with previous finds (e.g. by*  
728 *Mathieson et al. 2015; Cox and Mathieson 2020, PNAS).*

729



730 **Response:** We agree that this is broadly in line with the previous studies cited by the  
731 reviewer. These results can therefore be seen firstly as a validation that our ancestral  
732 risk score (ARS) analysis is consistent with prior findings for a phenotype which is well  
733 studied. The novelty of this analysis is that nobody has previously directly quantified  
734 the impact of Yamnaya ancestry on height in modern populations, which the ARS  
735 does. Instead of merely inferring that the genetically taller Yamnaya introduced height  
736 increasing alleles into modern populations, we have used local ancestry inference to  
737 explicitly quantify this, and calculated ancestry specific polygenic risk scores.

738

739 *--"Alleles associated with increased risk of some mood-related phenotypes are*  
740 *overrepresented in the farmer ancestry component." "Western hunter-gatherers show*  
741 *a strikingly high contribution of alleles conferring risk of traits related to diabetes. "*  
742 *These seem like novel claims, but are the authors confident of the claims, or do they*  
743 *think it could be subject to the caveats about projecting GWAS scores from present-*  
744 *day panels into the past that they bring up in the text? If they want present this as a*  
745 *significant scientific advance, can they expand on the evidence for this, and the*  
746 *robusticity of the analysis. How outlying are the scores for these?*

747

748 **Response:** We have removed the section of the manuscript in which we reported  
749 polygenic scores for ancient individuals, due to concerns about the portability of  
750 present-day GWAS effect sizes to populations that are only partially ancestral to the  
751 GWAS cohort. However, our ancestral risk score (ARS) analysis avoids the issue of  
752 portability entirely, by calculating the genetic risk that a modern individual would  
753 possess if they were composed entirely of one ancient ancestry. We believe that these  
754 results are robust, and have expanded our discussion of the ARS analysis in the main  
755 text.

756

757 **Changes:** We have updated the main text to make it clearer that this analysis is not  
758 affected by the portability issue.

759

760 Lines 500-508:

761 We calculated ancestry-specific polygenic risk scores—hereafter ancestral risk  
762 scores (ARS)—based on chromosome painting of >400,000 UKB genomes  
763 using ChromoPainter (Lawson et al. 2012) (Fig. 6, Supplementary Note 2f).  
764 This allowed us to identify which ancient ancestry components are over-  
765 represented in present-day UK populations at loci significantly associated with  
766 a given trait, and is analogous to the genetic risk that a modern individual  
767 would possess if they were composed entirely of one ancestry. This analysis  
768 avoids issues with the portability of polygenic risk scores between populations  
769 (Martin et al. 2017), as our ancestral risk scores are calculated from the same  
770 individuals used to estimate the effect sizes.

771

772 *--"a combination of ancient selection and migration, rather than recent local selection,*  
773 *is the primary driver of present-day phenotypic differences in Europe." To me this*  
774 *seems to have been the consensus for some time. Have recent papers suggested it*  
775 *was due to local selection?*

776

777 **Response:** Several recent papers have suggested local selection as a driver of  
778 present-day phenotypic differences. For example, Chen et al. (2020 *AJHG*  
779 <https://doi.org/10.1016/j.ajhg.2020.05.014>) reports evidence for local selection for  
780 reduced height in Sardinians, and Howe et al. (2022 *Nature Genetics*;  
781 <https://doi.org/10.1038/s41588-022-01062-7>) reports evidence for recent selection for  
782 increased height, increased number of children, and reduced HDL-cholesterol.

783

784 *There is an interesting find of natural selection on an inversion and duplication of*  
785 *KANSL1, but this is not mentioned in the abstract.*

786

787 **Response:** Our evidence of selection at the *KANSL1* locus is complicated. We find  
788 the *KANSL1* duplications to be present in elevated frequencies in some of our earliest  
789 samples, suggesting that selection may predate the time resolution of our study. We  
790 also detect a recent selective sweep which straddles the inversion and *KANSL1*  
791 duplications, but as we note in the main text, this region is also enriched for evidence  
792 of reference bias in our dataset, due to the complex structural polymorphisms which  
793 affect short-read mapping.

794

795 *Overall, a lot of the novel results seem to be claims about different timing of selection,*  
796 *than what has been suggested in previous paper. However, the authors don't really*  
797 *provide extensive simulation results or other validation experiments on how robust*  
798 *their timing inference is.*

799

800 **Response:** To validate the accuracy of the updates to the CLUES method, we have  
801 performed a set of new simulations. These simulations show that CLUES accurately  
802 infers selection coefficients and allele frequency trajectories for sample sizes smaller  
803 than used in our empirical analyses. Full details of the simulation design and  
804 benchmarking accuracy are described in Supplementary Note 2b.

805

806 *Overall, it is difficult to disentangle the scientific advance of the paper from that of the*  
807 *data that it presents the first selection analyses on, but were really produced by*  
808 *another paper (which will be cited for the data itself). That said, this paper has some*  
809 *very interesting analyses going, in some ways more interesting than the advances*  
810 *presented in the parallel submission with the new data.*

811

812 **Response:** We have further revised both the "main" paper and this manuscript to  
813 make the separation between the two papers clearer. These were originally submitted  
814 as one paper, which we were asked to split up by the editor. We believe this selection  
815 manuscript represents a substantial scientific advance that is independent of the data  
816 generated in the main paper. Our ancestry stratified time-series selection analysis,  
817 chromosome painting of ancient and present-day populations, and ancestral risk score  
818 analysis of the UK Biobank represent novel methodological approaches that advance  
819 the field of ancient DNA. Furthermore, the results stemming from these analyses make  
820 substantial contributions to our understanding of the strength and timing of selection at  
821 key dietary and immune loci, as well as characterising how differential ancestry has  
822 affected present-day anthropometric and disease traits in the British population.

823 *Major issues:*

824

825 *The authors conduct their main selection analysis (CLUES) not on the whole genome,*  
826 *but on a selected set of 33k SNPs from the GWAS catalog. They then match those*  
827 *with a neutral set. This seems like a sensible way to test if those SNPs have been*  
828 *subject to selection, but the caveat is that when they then dissect the selection peaks*  
829 *in the data, the actually targeted variant may lay somewhere nearby in the genome.*  
830 *There is thus an extra risk that when they discuss variants subject to selection and*  
831 *associated with particular traits in the text, the natural selection was not on those*  
832 *traits. I presume that this was not done genome-wide since CLUES is not easily*  
833 *scaled to such data, but this particular approach seems to increase the risk of*  
834 *storytelling, as there will always be a well-documented GWAS SNP at the height of*  
835 *every signal peak. Could the authors provide convincing evidence that those top SNPs*  
836 *are in fact the SNPs targeted by selection?*

837

838 **Response:** Establishing causality between a selection signal and a particular  
839 phenotype is extremely difficult, if not impossible, outside of an experimental evolution  
840 study. We agree with the reviewer that it is entirely possible that the variants directly  
841 targeted by selection may lay somewhere nearby in the genome. However, this  
842 problem would also be present in a genome-wide scan of all SNPs, as the truly  
843 adaptive variant may be an INDEL or structural variant in LD with a nearby SNP.  
844 Furthermore, it is entirely plausible that the truly adaptive phenotypes in recent human  
845 evolution are not well characterised in GWAS. Even in the case of putatively  
846 monogenic loci, establishing causality is not straightforward. For example, our results  
847 reveal strong evidence of at least two sweeps at the LCT/MCM6 locus, containing  
848 variants with strikingly different metabolic phenotypes. Nevertheless, our study has not  
849 sought to establish causality between a selection signal and a phenotype, and there is  
850 no need to directly invoke causality to link directional changes in allele frequencies to  
851 present-day phenotypic variation. In cases where we have strong evidence that a trait  
852 associated variant has changed in frequency, those changes will have affected  
853 present-day expression of that trait, regardless of the causal phenotype that drove the  
854 selective sweep.

855

856 **Changes:** To avoid any implication of causality between our selection analysis and  
857 our reporting of trait associations, we have moderated the language used when  
858 referring to trait associations, and have added further caveats to the discussion.

859

860 lines 566-570:

861 Due to the highly pleiotropic nature of each sweep region, it is difficult to ascribe  
862 causal factors to any of our selection signals. However, our results show that  
863 selection during the Holocene has had a substantial impact on present-day genetic  
864 disease risk, as well as the distribution of genetic factors affecting metabolic and  
865 anthropometric traits.

866

867 *Imputation seems key to the conclusion in the paper, could the authors discuss a bit*  
868 *more about how the results could be robust to imputation?*

869

870 **Response:** We have prepared a new paper which provides comprehensive validation  
871 and benchmarking of the imputation and phasing of the ancient samples used in this  
872 manuscript (da Mota et al. 2022 *bioRxiv*; <https://doi.org/10.1101/2022.07.19.500636>).  
873 The validation of the imputation accuracy is performed using 42 down-sampled high-  
874 coverage ancient genomes, and the validation of the phasing accuracy is performed  
875 using the first ever human aDNA trio. For a 1x ancient genome, we estimate an  
876 imputation error rate of 1.9% and a phasing switch error rate of 2.0%, which is  
877 comparable to modern genomes at equivalent coverage.

878  
879 To test for potential effects of imputation bias on our selection analyses, we ran  
880 additional models for each of the top SNPs in the pan-ancestry analysis, using  
881 genotype likelihoods (GL) called directly from the aDNA sequencing reads. Because  
882 our chromosome painting model requires phased haplotypes, this replication test was  
883 limited to pan-ancestry models only. When comparing the imputed and GL selection  
884 models, we observed that the posterior likelihood densities of the allele frequency  
885 trajectories are highly correlated, as are the selection coefficients. Due to the smaller  
886 sample sizes in the GL callset we have less power to reject neutrality, and the inferred  
887 log-likelihood ratio test statistics were consistently lower than in the imputed models,  
888 but all remained high. Overall, we did not detect any substantive bias when comparing  
889 these two sets of models.

890  
891 **Changes:** We have updated the main text to cite the new preprint, and have added  
892 the following summary text.

893  
894 lines 130-133:

895       This dataset comprises 1,664 imputed diploid ancient genomes and more than  
896       8.5 million SNPs, with an estimated imputation error rate of 1.9% and a  
897       phasing switch error rate of 2.0% for 1X genomes. Full details of the validation  
898       and benchmarking of the imputation and phasing of this dataset are provided in  
899       reference (da Mota et al. 2022).

900  
901 *The authors also seem to discuss one primary trait association for each SNP. Are any*  
902 *of the SNPs discussed in the main text associated with multiple traits?*

903  
904 **Changes:** Due to the pleiotropic nature of the human genome, many of the SNPs with  
905 evidence of selection have more than one association reported in the GWAS Catalog.  
906 We have updated the main text to include additional associations of the named  
907 variants, including associations from FinnGen and UK Biobank which are not reported  
908 in the GWAS Catalog. We provide a full list of all GWAS Catalog associations in  
909 Supplementary Note 2a and in Supplementary Table S2a.3.

910  
911 *The CLUES inferred trajectories seem highly constrained, but to which degree is this*  
912 *due to the heatmap colour scheme used in the supplementary figures. Could they*  
913 *colour values down to posterior probability ~0.05 more clearly? Also, these trajectories*  
914 *take the imputation and genealogical inference for granted, and thus do not portray*  
915 *the uncertainty associated with those.*

916

917 **Response:** The new CLUES benchmarking simulations (Supplementary Note 2b) show that  
918 the width of the allele frequency posterior trajectory is a function of sampling density and  
919 effective population size. In particular, as sampling density increases, the posterior density  
920 becomes more concentrated, because the model has more information about the true allele  
921 frequency trajectory. These simulations further show that even in cases where drift is very  
922 high (i.e.,  $N_e=1,000$ ), a sampling density of 250 diploids, sampled over 500 generations, is  
923 sufficient for the true allele frequency to mostly fall within the 95% bound of the posterior  
924 interval. The main reason why our CLUES trajectories appear highly constrained is because  
925 our imputed dataset contains a very high sampling density of 1,015 diploids sampled over  
926 529 generations. With regards to uncertainty from the imputation, this is taken into account  
927 in the model, as imputed genotype-probabilities are used as input into CLUES, rather than  
928 hard-called genotypes. Uncertainty in genealogical inference is also taken into account in  
929 CLUES through the importance sampling framework described in the original CLUES paper,  
930 although inferred genealogies were not used in the aDNA analysis and thus do not  
931 contribute to the inferred trajectory plots.

932

933 *On page 34 in the supplement, they report that in the CLUES analysis of aDNA with*  
934 *Ancestral Paintings, they identify quite substantial numbers of outliers also in the*  
935 *control set of SNPs, 346 in the GWAS group and 63 in the Control group. This doesn't*  
936 *seem to be mentioned in the main text.*

937

938 **Response:** We initially chose not to report the individual number of SNPs that achieve  
939 genome-wide significance in the main text, for either the GWAS or the Control groups,  
940 because we apply a secondary filtering step to detect clusters of significant SNPs  
941 which are consistent with a selective sweep. Reporting these clusters gives a more  
942 accurate indication of the number of independent selection signals detected, as the  
943 density of SNPs varies across the genome, and because we require at least 6  
944 genome-wide significant SNPs to call a sweep region. In the pan-ancestry analysis,  
945 we identified 51 genome-wide significant SNPs in the Control group (0.15%), but none  
946 were consistent with a selective sweep, because they were randomly distributed  
947 across the genome.

948

949 **Changes:** We have updated the main text to include the counts of significant SNPs for  
950 both groups.

951

952 lines 238-241:

953 In contrast, when using imputed aDNA genotype probabilities, we identified 11  
954 genome-wide significant selective sweeps in the GWAS group ( $n=476$  SNPs),  
955 and none in the control group ( $n=51$  SNPs), consistent with selection acting on  
956 trait-associated variants (Supplementary Note 2a, Supplementary Figs. S2a.3  
957 to S2a.25).

958

959 *The authors investigate the correlation of PCs with polygenic scores for traits such as*  
960 *height, but it does not seem appropriate to treat individuals as independent*  
961 *observations (they are related at different degrees), so it seems that some by-*  
962 *chromosome bootstrap or similar could gauge evolutionary uncertainty.*

963



964 **Response:** We have removed this section from the manuscript due to concerns about  
965 the portability of using present-day GWAS effect sizes to infer polygenic scores for  
966 populations which are only partially ancestral to the GWAS cohort.

967

968 *Regarding the possibility of SNPs beginning a frequency rise earlier than the classic*  
969 *lactase persistence candidate, the suggested 12,000 years ago for rise in frequency of*  
970 *rs1438307 is quite a bit further into the past than the majority of data available. Could*  
971 *the authors add confidence intervals to Figure S2a.44. If this is a major claim, then*  
972 *that figure could serve as a main text figure panel too.*

973

974 **Response:** We are confident in the robustness of these results, and have  
975 independently replicated the signal using publicly available data from the 1240k  
976 capture array data. This new analysis—using a different set of samples, genotyped  
977 with a different sequencing technology—shows the same pattern, in which rs1438307  
978 rises in frequency thousands of years before rs4988235 (Figure S2a.56). The  
979 maximum likelihood trajectories from the CLUES models for both rs1438307 and  
980 rs4988235 are depicted in Figure 4b in the main text.

981

982 **Changes:** We have added 95% confidence intervals to Figure S2a.55 and S2a.56.

983

984 *Could the authors provide a more intuitive rationale for why conditioning on ancestry in*  
985 *their particular analysis setup provides additional power to detect selection?*

986

987 **Response:** Our analysis suggests that there are several reasons why we detect more  
988 selection when conditioning on ancestry; one of which is increased statistical power. In  
989 cases where the selected allele is not segregating in all ancestral backgrounds (e.g., if  
990 it is private to one ancestral path), stratification by ancestry increases our power to  
991 detect selection, as it allows us to separate haplotypes in which the selected allele is  
992 absent (i.e., where selection can have no observable effect). Similarly, in cases where  
993 selection is influenced by epistasis, stratification by ancestry may allow us to separate  
994 haplotypes that contain only a subset of the adaptive markers.

995

996 However, the main reason we detect more selection is due to the effects of multiple  
997 waves of admixture. Our pan-ancestry analysis spans three major waves of admixture  
998 (Figure 3), which coincide with dramatic changes in subsistence strategy, as well as  
999 large movements of people into new environmental niches. In cases where selection is  
1000 acting in only one population, admixture can confound analyses based on time-series  
1001 data, especially when the admixing populations have substantially different allele  
1002 frequencies. Stratifying by ancestry controls for this effect, as it allows us to model  
1003 changes in allele frequency independently of changes in admixture fraction.

1004

1005 *Why did the authors opt for a 4-way mixture model with EHG and CHG, instead of*  
1006 *WHG, Anatolia, and Yamnaya?*

1007

1008 **Response:** Evidence suggests that the Yamnaya population was formed from the  
1009 admixture of EHG and CHG populations. Given that we have a number of  
1010 representative samples from both these populations as well as Yamnaya samples we  
1011 included two paths leading to the Yamnaya population. This allows insight into

1012 selection events happening on an EHG vs CHG ancestry background rather than  
1013 simply on a Yamnaya background, especially in cases where selection may have  
1014 occurred before the admixture events that formed the Yamnaya population.

1015  
1016 *"in chromosome 18, we recover a selection candidate region spanning SMAD7, which*  
1017 *is associated with inflammatory bowel diseases such as Crohn's disease 41–43.*

1018 *Taken together these results suggest that the transition to agriculture imposed a*  
1019 *substantial amount of selection for humans to adapt to our new diet and that some*  
1020 *diseases observed today in modern societies can likely be understood as a*  
1021 *consequence of this selection."*

1022 *-The link between ancient selection and present-day disease seems overly speculative*  
1023 *based on the data presented in this paper.*

1024

1025 **Changes:** We have softened the language used to describe these results.

1026

1027 lines 313-316:

1028 Taken together these results suggest that the transition to agriculture imposed  
1029 a substantial amount of selection for humans to adapt to a new diet and  
1030 lifestyle, and that the prevalence of some diseases observed today in present-  
1031 day societies may be a consequence of these selective processes.

1032

1033 *"However, profound shifts in lifestyle in Eurasian populations during the Holocene,*  
1034 *including a change in diet and closer contact with domestic animals, combined with*  
1035 *higher mobility and increasing population sizes, are likely drivers for strong selection*  
1036 *on loci involved in immune response."*

1037 *-Maybe, but there is no firm data on this yet. Perhaps the authors could say "have*  
1038 *been hypothesized to be likely drivers...."*

1039

1040 **Changes:** We have softened the language used here.

1041

1042 lines 346-349:

1043 However, profound shifts in lifestyle in Eurasian populations during the  
1044 Holocene have been hypothesised to be drivers for strong selection on loci  
1045 involved in immune response. These include a change in diet and closer  
1046 contact with domestic animals, combined with higher mobility and increasing  
1047 population density.

1048

1049 *"These results suggest that large, recurrent CNVs that can lead to several pathologies*  
1050 *were present at similar frequencies in the ancient and modern populations included in*  
1051 *this study. " Can it really be assumed that the ancient sample is representative of the*  
1052 *past frequencies? It seems too much to make conclusions about prevalence.*

1053

1054 **Response:** We believe that it is reasonable to assume that the frequency of CNVs observed  
1055 in our ancient samples is representative of past prevalence. To control for potential bias from  
1056 low sequencing depth, and other aDNA characteristics, we estimate CNV prevalence after  
1057 performing quality control filtering of our ancient genomes. It is possible that the underlying  
1058 samples are themselves biased with respect to CNV prevalence (e.g., if a CNV pathology  
1059 reduced the likelihood of survival into adulthood), but we have no evidence to suggest this is

1060 the case. Nevertheless, these results are specifically worded to report that we observe  
1061 similar frequencies “in the ancient and modern populations included in this study”.

1062 *[Minor points, requested clarifications, typos]*

1063

1064 *Table S2d.3 West Eurasia.cw\_hg spans 40 pages. Can it be reduced?*

1065

1066 **Changes:** We have moved this table (Supplementary Table S2d.3), and all other long  
1067 tables, into a separate Supplementary Tables spreadsheet.

1068

1069 *Abstract:*

1070 *Page 1: “high contribution of alleles conferring risk of traits related to diabetes.”*

1071 *wording*

1072

1073 **Changes:** We have reworded this sentence.

1074

1075 lines 63-67:

1076 Alleles associated with increased risk of some mood-related phenotypes are  
1077 overrepresented in the farmer-associated component, entering Europe from  
1078 Anatolia around 11,000 years ago, while risk alleles for diabetes and  
1079 Alzheimer's disease are highly enriched for tracts with affinities to ancient  
1080 Western Hunter-gatherers.

1081

1082 *Results/discussion:*

1083 *Samples and data*

1084 *Page 3: “Unprecedented sample”, “unprecedented details” repeat words*

1085

1086 **Changes:** We have removed all usage of the word “unprecedented”

1087

1088 lines 128-130:

1089 Our analyses are undertaken on the largest collection of shotgun-sequenced  
1090 ancient genomes published to date; presented in the accompanying study  
1091 ‘Population Genomics of Stone Age Eurasia’ (Allentoft et al. 2022).

1092

1093 lines 139-141:

1094 This dataset allows us to characterise in fine detail the changes in selective  
1095 pressures exerted by major transitions in human culture and environment.

1096

1097 lines: 435-438

1098 Additionally, our results provide detailed information about the duration and  
1099 geographic spread of these processes (Fig. 4) suggesting that an allele  
1100 associated with lighter skin was selected for repeatedly, probably as a  
1101 consequence of similar environmental pressures occurring at different times in  
1102 different regions.

1103

1104 *Figure 1*

1105 *Sampling times and pop split times don't line up, especially 180 generations ago*



1106 *Maybe add borders to distinguish the different parts, legends etc*

1107

1108 **Changes:** We have replaced this figure with a new version (Figure 2) that describes  
1109 the improved model used in the current results.

1110

1111 *Selection on diet-associated loci*

1112 *Page 5: "settling controversies regarding the timing of this selection" too strong word*

1113

1114 **Changes:** We have reworded the main text to remove the claim that our results settle  
1115 the controversies of the timing of this selection.

1116

1117 lines 250-252:

1118 We find strong changes in selection associated with lactose digestion after the  
1119 introduction of farming, but prior to the expansion of the Steppe pastoralists  
1120 into Europe around 5,000 years ago (Allentoft et al. 2015; Haak et al. 2015),  
1121 the timing of which is a long standing controversy (Enattah et al. 2008; Itan et  
1122 al. 2009; Ségurel and Bon 2017; Segurel et al. 2020).

1123

1124 *Genetic trait reconstruction and the phenotypic legacy of ancient Europeans*

1125 *Page 13: "help to settle the famous discussion of selection in Europe relating to*  
1126 *height" again perhaps too bold a claim*

1127

1128 **Changes:** We have reworded this sentence.

1129

1130 lines: 554-559

1131 These results also help to clarify the famous discussion of selection in Europe  
1132 relating to height (Mathieson et al. 2015; Cox et al. 2019; Rosenstock et al.  
1133 2019). Our finding that the 'Steppe' ancestral components (Yamnaya/EHG)  
1134 have consistently high genetic values for height in the UK Biobank  
1135 demonstrates that height differences between Northern and Southern Europe  
1136 may be a consequence of differential ancestry, rather than selection, as  
1137 claimed in many previous studies (Field et al. 2016). However, our results do  
1138 not preclude the possibility that height has been selected for in specific  
1139 populations (Chen et al. 2020; Howe et al. 2022).

1140

1141

1142 *Referee #3 (Remarks to the Author):*

1143

1144 *This paper presents multiple extremely interesting analyses of patterns of genetic*  
1145 *variation across several hundred ancient genomes, shedding new light on how natural*  
1146 *selection drove rapid changes in allele frequency at a number of loci across the*  
1147 *genome during the evolutionary history of modern Europeans. The methods are*  
1148 *innovative, and the results provide new insights into the timing of the onset of natural*  
1149 *selection for several mutations that are known to have played an important role in*  
1150 *adaptation as human migrated into and across Europe (e.g. FADS, LCT), as well as*  
1151 *the identification of new candidate selective sweeps that were previously obscured by*  
1152 *the effects of admixture. My criticisms below notwithstanding, it represents a real*  
1153 *triumph for aDNA in looking back in time to reconstruct human evolutionary history. I*  
1154 *think that many of the analyses and results potentially of interest to the broad Nature*  
1155 *readership.*

1156

1157 *However, there are several aspects of the manuscript that need work. I have one*  
1158 *major substantive criticism, as well as some frustration that several aspects of the*  
1159 *manuscript simply do not appear ready for publication.*

1160

1161 **Response:** We thank the reviewer for their assessment that our paper is extremely  
1162 interesting and that it represents a real triumph for aDNA. To address the issues  
1163 raised by the reviewer, we have made multiple improvements to the original  
1164 manuscript, which we outline in detail below.

1165

1166 #####

1167 *My substantive criticism:*

1168

1169 *the connection between a particular positive selection signal and a given nearby*  
1170 *complex trait association is often not clear. In many cases, the actual evidence of a*  
1171 *link is extremely weak or altogether absent, but the manuscript is framed as if such*  
1172 *evidence exists.*

1173

1174 **Response:** We have updated the main text to moderate the language used when  
1175 referring to selection signals and the trait associations of the top SNPs (details below).

1176

1177 ###

1178 *For example, psoriasis is mentioned in the abstract as a phenotype that has a high*  
1179 *prevalence, and imply that their results may explain why. As far as I can tell, aside*  
1180 *from the supplementary tables the only mention of psoriasis in the paper is in this*  
1181 *sentence:*

1182

1183 *"In contrast, the signal of selection at C2 (rs9267677;  $p=9.82e-14$ ;  $s=0.04463$ ), also*  
1184 *found within this sweep, and associated with psoriasis risk in UK Biobank ( $p=4.1e-$*   
1185 *291;  $OR=2.2$ ), shows a gradual increase in frequency beginning c. 4,000 years ago,*  
1186 *before rising more rapidly c. 1,000 years ago."*

1187

1188 *However, I noticed a nearly identical sentence in the supplement, but the phenotype*  
1189 *mentioned there is educational attainment:*

1190

1191 *"In contrast, the signal of selection at C2 (rs9267677; p= 9.82e-14; s= 0.04463), also*  
1192 *found within this sweep, and associated with educational attainment, shows a gradual*  
1193 *increase in frequency beginning c. 4,000 years ago, before rising more rapidly c.*  
1194 *1,000 years ago; highlighting the complex temporal dynamics of selection at the HLA*  
1195 *locus."*

1196

1197 *Would the authors also be willing to argue in the abstract that this signal of selection*  
1198 *may help explain patterns of variation in educational attainment? The strength of the*  
1199 *evidence for either conclusion is basically the same.*

1200

1201 **Response:** As we were interested in understanding how natural selection has  
1202 influenced the evolution of human traits, we compiled an exhaustive list of all trait  
1203 associations reported in the GWAS Catalog. A consequence of this approach is that  
1204 some of the trait associations were for phenotypes which have debatable  
1205 interpretation outside of the specific environmental context, and socioeconomic status  
1206 of the cohort, in which they were measured. We chose not to feature associations for  
1207 traits like this in the main text, as these are more likely to be enriched for uncorrected  
1208 stratification, and their interpretive value in ancient populations is unclear (see Irving-  
1209 Pease et al. 2020 *Front. Genet.*; <https://doi.org/10.3389/fgene.2021.703541>). In the  
1210 specific case of rs9267677, we note that the odds-ratio for the association with  
1211 educational attainment is less than 1.02 (Lee et al. 2018 *Nature Genetics*;  
1212 <https://doi.org/10.1038/s41588-018-0147-3>), whereas the odds-ratio for the  
1213 association with psoriasis is 2.2; consistent with selection at rs9267677 explaining a  
1214 substantially larger fraction of present-day variation in psoriasis risk than it does for  
1215 EA.

1216

1217 **Changes:** We have removed the specific reference to psoriasis in the abstract.

1218

1219 lines 49-52:

1220 A substantial amount of selection is also found in the HLA region and other loci  
1221 associated with immunity; possibly due to increased exposure to pathogens  
1222 during the Neolithic, which may have contributed to the currently high  
1223 prevalence of auto-immune diseases.

1224

1225 **###**

1226 *Another example, not directly related to the main, selective sweep focus of the paper,*  
1227 *is in the section titled: "Pathogenic structural variants in ancient vs. modern-day*  
1228 *humans".*

1229

1230 *The authors write:*

1231

1232 *"RISE586 exhibited a hypoplastic tooth, spondylolysis of the L5 vertebrae, incomplete*  
1233 *coalescence of the S1 sacral bone, among other minor skeletal phenotypes. The*  
1234 *skeletal phenotypes observed in this individual are relatively common (~10%) in*  
1235 *European populations and are not specific to 16p13.1 thus do not indicate strong*

1236 *penetrance of this mutation in RISE586. However, these results do highlight our ability*  
1237 *to link putatively pathogenic genotypes to phenotypes in ancient individuals."*

1238  
1239 *I do not see how a pathogenic genotypes has been in any way "linked" to phenotypes*  
1240 *in ancient individuals. One ancient individual has phenotypes that are common among*  
1241 *other ancient individuals, and also carries the deletion/duplication. This is not a result.*  
1242 *It just means that the authors were able to genotype an individual for whom they can*  
1243 *also measure skeletal traits. I understand that there is some hope that potentially in*  
1244 *the long run this sort of paired data can be used to learn more about the relationship*  
1245 *between the genotypes and phenotypes of ancient individuals, but this hasn't actually*  
1246 *been done here. I think writing that this mutation is not strongly penetrant in this*  
1247 *individual is positively misleading. There is no evidence of ANY penetrance or*  
1248 *relationship to the phenotype whatsoever.*

1249  
1250 *(I should also note that it is not clear to me whether the the variant of interest in the*  
1251 *above section is a deletion or duplication. In line 388, first it is a duplication*  
1252 *("duplications at 16p13.11"), then later in the same line it is a deletion ("An individual*  
1253 *harbouring the 16p13.11 deletion"). Maybe there are both? I can't tell...*

1254  
1255 **Changes:** We have removed the paragraph that implied an association between the  
1256 pathogenic CNV and the observed skeletal traits.

1257  
1258 *In general, I think the paper significantly oversells what the results actually tell us*  
1259 *about phenotypic variation. The abstract closes with a sentence that begins: "Our*  
1260 *results paint a picture of the combined contributions of migration and selection in*  
1261 *shaping the phenotypic landscape of present-day Europeans...". But as I've argued*  
1262 *above, there is generally little to no evidence linking the reported results to the*  
1263 *"phenotypic landscape" of present-day Europeans.*

1264  
1265 **Response:** The results presented in our manuscript have two broad approaches. The  
1266 first approach focuses on identifying evidence of selection for trait associated variants.  
1267 In our ancestry stratified time-series analysis, we identified 21 genome-wide significant  
1268 loci with evidence of strong selection. However, linking these loci to phenotypic  
1269 outcomes is complicated, because each loci is highly pleiotropic and most traits of  
1270 interest are highly polygenic. For large effect loci, like LCT, SLC45A2 and FADS,  
1271 single-locus results can inform directly on the phenotypes of present-day Europeans,  
1272 but for many other loci the picture is more complicated. This is why we undertook the  
1273 second major approach of the paper, which focused on understanding the present-day  
1274 genetic legacy of Mesolithic hunter-gatherer, Neolithic farmer and Bronze Age  
1275 pastoralist populations. Using our ancient genomes as 'donors' to chromosome paint  
1276 the UK Biobank, we identified the local ancestry composition of different complex  
1277 traits, in the same genomes used to perform the GWAS. We used this information to  
1278 develop ancestral risk scores (ARS) for 35 complex traits (Figure 6), which represent  
1279 the differing contributions of ancestral populations to present-day phenotypes in more  
1280 than 400,000 British people. Our results reveal major differences in the contributions  
1281 of ancestral risk to present-day people for a range of anthropometric, metabolic and  
1282 disease traits. To better highlight the significance of these findings, we have made  
1283 substantial modifications to the main text to include additional discussion of these

1284 results under the subheading “The phenotypic legacy of ancient Eurasians” on line  
1285 497.

1286

1287 *For some of these sweeps it is entirely possible that the phenotypes that drove them*  
1288 *are not expressed in the modern human environment. The field has been identifying*  
1289 *selection signals physically nearby to trait associations for some time now, and that's*  
1290 *what most of them still are: two different signals that are close to one another in the*  
1291 *genome but have not other obvious connection. The signals here seem a lot more*  
1292 *likely to be "real" than many earlier ones based on iHS or other similar metrics, but the*  
1293 *hard work of determining how these sweeps are related to present day phenotypic*  
1294 *variation, if at all, lies in the future. To be clear, I think that pointing out nearby*  
1295 *phenotypic association or known functions of sweep candidates is fine, but that the*  
1296 *overall packaging of the manuscript as if it sheds serious light on this goes too far.*

1297

1298 **Response:** Establishing causality between a selection signal and a particular  
1299 phenotype is extremely difficult, if not impossible, outside of an experimental evolution  
1300 study. We agree with the reviewer that it is entirely possible, if not likely, that the truly  
1301 adaptive phenotypes in recent human evolution are not well characterised in GWAS.  
1302 Even in the case of putatively monogenic loci, establishing causality is complicated.  
1303 For example, our results show strong evidence of at least two sweeps at the  
1304 LCT/MCM6 locus, containing variants with strikingly different metabolic phenotypes.  
1305 Nevertheless, our study has not sought to establish causality between a selection  
1306 signal and a phenotype, and there is no need to invoke causality to link changes in  
1307 allele frequencies to present-day phenotypic variation. In cases where we have strong  
1308 evidence that a trait associated variant has changed in frequency, those changes will  
1309 have affected present-day expression of that trait, regardless of the causal  
1310 phenotype(s) that drove the selective sweep.

1311

1312 **Changes:** To avoid any implication of causality between our selection analysis and  
1313 our reporting of trait associations, we have moderated the language used when  
1314 referring to trait associations, and have added further caveats to the discussion.

1315

1316 lines 566-570:

1317       Due to the highly pleiotropic nature of each sweep region, it is difficult to ascribe  
1318       causal factors to any of our selection signals. However, our results show that  
1319       selection during the Holocene has had a substantial impact on present-day genetic  
1320       disease risk, as well as the distribution of genetic factors affecting metabolic and  
1321       anthropometric traits.

1322

1323 #####

1324

1325 *My second major criticism is that the supplement appears incomplete and has many*  
1326 *errors and in many places either does not produce enough detail about the methods*  
1327 *used, or has text which doesn't fully track.*

1328

1329 *For example, there is a paragraph starting on line 187 of the supplement that explains*  
1330 *why knowing only the first coalescent event is not sufficient for understanding the full*  
1331 *ancestry of a given haplotype. While this is no doubt true, this text is not obviously*



1332 *related to the surrounding text. I can surmise that it may be an explanation of why the*  
1333 *tool MSMC (which models the first coalescent event and was developed in senior*  
1334 *author Richard Durbin's group) isn't an appropriate tool for this task, but MSMC is*  
1335 *never explicitly referenced, nor is the "first coalescence event" mentioned anywhere*  
1336 *else in the main text or the supplement.*

1337

1338 **Response:** To address the lack of detail regarding our novel chromosome painting  
1339 model, we have prepared a separate manuscript which comprehensively describes the  
1340 methodology, validation and benchmarking of the method (Pearson & Durbin 2023  
1341 *bioRxiv*; <https://doi.org/10.1101/2023.03.06.529121>). We have also added additional  
1342 discussion to the supplementary text to address the specific issue raised by the  
1343 reviewer.

1344

1345 *Relatedly, the authors say they adapted CLUES to model time series data. It's hard to*  
1346 *tell from the supplemental text whether they've ADDED time series data on top of the*  
1347 *existing functionality that uses inferred ARGs (i.e. using aDNA and ARGs jointly), or if*  
1348 *it's just that they've taken the CLUES codebase and basically spun off a different (but*  
1349 *obviously related) method that uses a time series of aDNA to infer trajectories. The*  
1350 *current descriptions in the supplement are extremely cursory, and I think it would be*  
1351 *appropriate for the authors to given a more complete description of the methods as*  
1352 *actually used.*

1353

1354 **Response:** Our new version of the CLUES software can be run in three possible  
1355 modes, using either (i) ARGs only; (ii) aDNA time-series only; or (iii) aDNA time-series  
1356 and ARGs jointly. In this analysis, we used ARGs only for the 1000G populations; and  
1357 aDNA time-series only for the ancient populations. This is described in Supplementary  
1358 Note 2a (e.g., “We also ran CLUES in an alternative mode, excluding the modern  
1359 ARG data, and replacing them with aDNA time series data”), where we also provide a  
1360 complete list of the command line arguments used. We have also provided a GitHub  
1361 repository that contains all the pipeline code, and a conda environment, to fully  
1362 reproduce our CLUES analyses (see [https://github.com/ekirving/mesoneo\\_paper/](https://github.com/ekirving/mesoneo_paper/)).  
1363 We also provide another GitHub repository that contains the revised version of  
1364 CLUES, and includes a tutorial on how to use it (see [https://github.com/standard-](https://github.com/standard-aaron/clues)  
1365 [aaron/clues](https://github.com/standard-aaron/clues)). To validate the accuracy of our updates to the CLUES method, we have  
1366 performed a set of new simulations. These simulations show that CLUES accurately  
1367 infers selection coefficients and allele frequency trajectories for sample sizes smaller  
1368 than used in our empirical analyses. Full details of the simulation design and  
1369 benchmarking accuracy are described in Supplementary Note 2b.

1370

1371 *At line 3050 in supplementary section 2g, the authors write:*

1372

1373 *"To calculate an ancestry-specific PRS we used an additive model, including a*  
1374 *transformation as in Berg & Coop and in line with (Supplementary Note S2c (Allentoft*  
1375 *et al. 2022))"*

1376

1377 *I can't tell what transformation in Berg & Coop they are referring to. I also checked the*  
1378 *Allentoft citation and there does not appear to be a section 2c.*

1379

1380 **Changes:** The Berg & Coop transformation is a conversion of the scores to standard  
1381 deviations from the pan-ancestry mean (i.e., the mean of all ancestries analysed). The PRS  
1382 are therefore shown in z-score units. We have also fixed the incorrect cross-reference.

1383  
1384 lines 3620-3622 (Supplement):

1385 To calculate an ancestry-specific PRS we used an additive model, including a  
1386 transformation as in Berg & Coop, which converts scores to standard  
1387 deviations from a pan-ancestry mean (i.e. z-scores).

1388  
1389 *Additional pieces of the supplement that still need some work:*

1390  
1391 *Supplementary text 1a switches back and forth between first person singular and first*  
1392 *person plural.*

1393  
1394 **Response:** We have reviewed the supplement, and made various changes to improve  
1395 consistency, clarity and improve robustness of the analysis.

1396  
1397 *Figure S2c.2, it appears the row labels have been removed, presumably by accident.*

1398  
1399 *For Figure S2c.3, the traits are referenced only by their numbers in the "UK Biobank*  
1400 *coding system". I think it is not unreasonable for readers to expect a figure with human*  
1401 *readable trait labels on it.*

1402  
1403 *For Figure S2c.6, the figure caption reads "Principal component analysis on West*  
1404 *Eurasian samples coloured by individual polygenic scores.", but no part of the figure*  
1405 *indicates what trait the polygenic scores are for. Searching the text, it seems like it is*  
1406 *for height, but this should be clearly indicated in the figure.*

1407  
1408 **Changes:** We have removed this chapter from the supplement, and the corresponding  
1409 results from the main text, due to reviewer concerns about the portability of present-  
1410 day effect size estimates in populations that are only partially ancestral to the  
1411 discovery cohort.

1412  
1413 *Tables S2d.1 S2d.2 and S2d.3 have no figure captions. I can mostly guess at what the*  
1414 *column headings are, but readers shouldn't have to. The supplementary text refers to*  
1415 *Tables S2d.1 and S2d.2, but there does not appear to be a reference to Table S2d.3*  
1416 *anywhere in the text.*

1417  
1418 **Changes:** We have moved these tables into a separate Supplementary Tables  
1419 spreadsheet, and better annotated the column headers (see Supplementary Table  
1420 S2d.1 - S2d.3).

1421  
1422 *Note that this list is not exhaustive, and I do not think that the authors merely need to*  
1423 *respond to the specific examples I point out. Rather, I think the authors need to take a*  
1424 *serious pass through the supplement again, including sections that I do not explicitly*  
1425 *note here, and make sure that it is actually ready for publication.*

1426

1427 **Changes:** We have reviewed the supplement, and made various changes to improve  
1428 consistency, clarity and improve robustness of the analysis.

1429

1430 #####

1431

1432 *Lastly, I have a few comments on the "polygenic selection" analyses relying on*  
1433 *polygenic scores:*

1434

1435 *1) I could not find the actual quantitative results of this analysis. There are figures in*  
1436 *the main text that show the traits that pass a bonferroni multiple testing threshold, and*  
1437 *figures in the supplement that show a heatmap of some summaries of the analysis (as*  
1438 *noted above, however, these figures are not human readable), but readers should*  
1439 *have access to the actual results.*

1440

1441 **Response:** We have removed some of the analyses which were missing the raw  
1442 quantitative results, and now provide a separate Supplementary Tables spreadsheet for all  
1443 the remaining results.

1444

1445 *Relatedly, there is some basic information about the empirical randomization scheme*  
1446 *that I could not find: e.g. how many null replicates were sampled to generate the*  
1447 *empirical p values?*

1448

1449 **Changes:** We have removed this chapter from the supplement, and the corresponding  
1450 results from the main text, due to reviewer concerns about the portability of present-day  
1451 effect size estimates in populations that are only partially ancestral to the discovery cohort.

1452

1453 *2) The statement at line 464 that "these analyses help to settle the famous discussion*  
1454 *of selection in Europe relating to height" is far too strong. There are at least three*  
1455 *potentially distinct signals of selection on height that have been reported in or near*  
1456 *Europe. Field et al 2016 reported a signal of recent selection for increased height in*  
1457 *Britain within the last 2000 years, based on analyses using the singleton density score*  
1458 *(Howe et al 2022 also supported this result using sibling based effect sizes which are*  
1459 *free of confounding). There is also a reported signal of selection for decreased height*  
1460 *in Sardinia, supported by effect sizes from the Biobank of Japan (Chen et al 2020).*  
1461 *Then, there is the signal that's being reported here, which is similar to one reported by*  
1462 *Mathieson et al 2015. I think the authors should be clearer about the broader context*  
1463 *and complex history of this particular question.*

1464

1465 **Response:** The signal of polygenic adaptation reported in Field et al. (2016, *Science*;  
1466 <https://doi.org/10.1126/science.aag0776>) was based on GWAS effect sizes from GIANT and  
1467 R15-sibs, both of which were confounded by stratification along the North-South gradient  
1468 where signals of selection were reported (Berg et al. 2019, *eLife*;  
1469 <https://doi.org/10.7554/eLife.39725>). The signals reported in Chen et al. (2020 *AJHG*  
1470 <https://doi.org/10.1016/j.ajhg.2020.05.014>) and Howe et al. (2022 *Nature Genetics*;  
1471 <https://doi.org/10.1038/s41588-022-01062-7>) relate to specific populations, and make no  
1472 broader claim about a North-South gradient.

1473



1474 **Changes:** We have reworded the presentation of our results on height to include  
1475 citations to these three papers.

1476

1477 lines: 554-559

1478       These results also help to clarify the famous discussion of selection in Europe  
1479 relating to height (Mathieson et al. 2015; Cox et al. 2019; Rosenstock et al.  
1480 2019). Our finding that the 'Steppe' ancestral components (Yamnaya/EHG)  
1481 have consistently high genetic values for height in the UK Biobank  
1482 demonstrates that height differences between Northern and Southern Europe  
1483 may be a consequence of differential ancestry, rather than selection, as  
1484 claimed in many previous studies (Field et al. 2016). However, our results do  
1485 not preclude the possibility that height has been selected for in specific  
1486 populations (Chen et al. 2020; Howe et al. 2022).

## Reviewer Reports on the First Revision:

Referees' comments:

Referee #1 (Remarks to the Author):

I thank the authors for the comprehensive response to my review. I am largely satisfied. I have just a couple suggestions for clarifications in the text and supplement:

- In response to a comment from R2, the authors added (L238-241) the number of SNPs that make up each of the significant sweep signals. This results in the rather confusing statement that they identified "none in the control group (n=51 SNPs)". I suggest rephrasing to clarify that these SNPs were significant, but did not meet the secondary criteria to for being a sweep.

- I found the the description provided in the response letter of how this approach differs from other recent methods to be extremely helpful in framing its contribution. I would suggest adding this to the supplement.

Referee #2 (Remarks to the Author):

The manuscript by Irving-Pease et al. has been substantially revised, and one major advance of the previous submission has now instead been moved to a separate paper (Pearson and Durbin 2023, bioRxiv). The paper provides several highly interesting observations, but similarly to other reviewers I think conclusions tend to not be appropriately caveated.

I have several concerns about the revised paper:

### 1. Other manuscripts

The first is the questions about the delimitations of companion papers and dual publication. This Irving-Pease et al. manuscript is part of a network of papers (Irving-Pease et al., Allentoft et al., da Mota et al., Barrie et al., Pearson and Durbin). Arguably the greatest advance of the previous manuscript was the deconvolution of ancestry which allowed selection in different ancestral populations to be reconstructed. This is now published in a separate preprint by Pearson and Durbin, which I assume is the primary publication of the method. The main text of this revised paper still claims that this method is "novel"-but surely it is not if it is presented in the preprint. This should be corrected and what is novel in this paper should be delimited from what is presented in other publications.

The current submission thus reports neither new ancient genomes (which are reported in the Allentoft et al. 'main paper' submission), or strongly novel approaches aside from the incorporation of ancient genome allele frequencies in CLUES (which is a very welcome advance). Also the fascinating signals discussed in the HLA locus are presented in a separate Barrie et al. preprint. Figure 1 is a description of data that is previously published, and presented new by Allentoft et al.

All these aspects reduce the advance that this paper represents, and in my view causes some degree of confusion in the scientific literature.

## 2. Restricting selection scans to 33 thousand functional SNPs

As mentioned in previous reviews, this paper takes a different approach to previous leading selection papers (e.g. Mathieson et al. 2015, Field et al. 2018) and doesn't scan the entire genome of millions of loci, but only scans 33 thousand SNPs.

In the revised version, the authors respond to these concerns by talking about "causality" and removing any mention of such causality. But to me the point is not about causality, but about whether their approach has identified the SNPs with the most evidence for selection in their data or missed them, a question which could be decoupled from phenotypes altogether. Their analysis of the LCT region seems to prove this point, as when they re-scan the entire broader locus they find that the most evidence for selection is in a SNP not included in the first scan. I think the caveat of other selected SNPs possibly being nearby should be mentioned clearly.

Other points:

Figure 2 shows proportions of ancestry across Eurasia and in Britain, but methods such as CHROMOPAINTER have been demonstrated to be sensitive to demographic history, for example variable rates of genetic drift in different populations (Lawson, van Dorp, and Falush 2018). What are the confidence intervals for these estimates, e.g. of WHG and EHG ancestry in East Asia?

The paper highlight in the abstract differential Neolithic farmer ancestry across the UK, with higher proportions in the south and east, but this has already been shown by Patterson et al. 2021 and Olalde et al. 2018, and the former study addressed exactly the question of why there are these differences in Britain.

No state of the art study claims white British are homogeneous. See e.g. Leslie et al. 2015 in which analysis of the POBI data revealed fine-scale structure, and more recently Saada et al. 2020 who analysed the UK Biobank.

They claim that the most strongly selected pigmentation alleles reached fixation several thousand years ago, but to me it is hard to see what is novel compared to evidence presented e.g. by Ju and Mathieson 2021.

"The selective forces likely favouring ApoE2 in Steppe pastoralists may be associated with protective immune responses against infectious challenges, such as protection against severe childhood malaria or infection with an unknown coronavirus" -why specifically a coronavirus? This seems sensationalistic.

Overall, I think this paper provides an interesting and valuable analysis of the new substantial data to-be-presented in the Allentoft et al. preprint, but has reduced novelty due to the expansive network of multiple publications.

Referee #4 (Remarks to the Author):

The authors present a rigorous analysis of selection on complex traits in Europe over the last 12,000 years using ~1,600 imputed ancient genomes. They also describe the role of ancient admixture in shaping the genetic variation underlying complex traits in present-day Europeans. I found the manuscript very interesting and for the most part, clearly written. This is not easy given the limited space. The authors also seem to have done a commendable job of responding to the reviewers' comments constructively and addressing them.

In particular, reviewer 3's comment on the weak link between selection hits and trait-associated variants was well-made. As the authors wrote, connecting selection hits to traits is not trivial and remains an unsolved problem in the field. This does not kill the study as long as the results are properly caveated, which they are. The authors have also toned down the language throughout the paper sufficiently so as not to imply that a signal of selection on a variant implies selection on a trait that the variant or some other variant nearby might be associated with.

I do have some minor comments:

1. The differences in ancestral risk scores seen in Fig. 6 could yet be due to subtle inflation in effect sizes due to stratification in the original GWAS given that there are ancestry gradients in UKB in the same direction. For example, they found height ARS to be higher for Steppe compared to WHG, which is consistent with people in the north being taller and having more Steppe ancestry compared to people in the south who have more WHG ancestry. This could either be a real signal — that the ancestry gradient actually contributes to the north-south cline in height — or it could be because the GWAS effect sizes are influenced by uncorrected stratification in the UKB. The authors recognize this as well in Supplementary note S2f and I don't necessarily think this is the case. But I wonder, given the strongly worded statement in lines 554, if the authors should also state this caveat in the main text.
2. In Figs. 3 and S1c1, please clarify that the numbers along the paths are effective population sizes (presumably).
3. I couldn't find the generation time used to convert the time in generations in Figs. 3 and S1c1 and the time in years in Fig. 4.

Presumably between 25-30 years given the scales but good to be explicit.

80 *Referees' comments:*

81

82 *Referee #1 (Remarks to the Author):*

83

84 *I thank the authors for the comprehensive response to my review. I am largely satisfied. I*  
85 *have just a couple suggestions for clarifications in the text and supplement:*

86

87 *- In response to a comment from R2, the authors added (L238-241) the number of SNPs that*  
88 *make up each of the significant sweep signals. This results in the rather confusing statement*  
89 *that they identified "none in the control group (n=51 SNPs)". I suggest rephrasing to clarify*  
90 *that these SNPs were significant, but did not meet the secondary criteria to for being a*  
91 *sweep.*

92

93 **Changes:** We have reworded this sentence to improve clarity.

94

95 lines 228-232:

96 In contrast, when using imputed aDNA genotype probabilities, we identified 11  
97 genome-wide significant selective sweeps in the GWAS group (n=476 SNPs  
98 with  $p < 5e-8$ ), and no sweeps in the control group, despite some SNPs  
99 exhibiting evidence of selection (n=51). These results are consistent with  
100 selection preferentially acting on trait-associated variants (Supplementary Note  
101 2a, Supplementary Figs. S2a.3 to S2a.25).

102

103 *- I found the the description provided in the response letter of how this approach differs from*  
104 *other recent methods to be extremely helpful in framing its contribution. I would suggest*  
105 *adding this to the supplement.*

106

107 **Changes:** We have added an additional section to Supplementary Node 2a  
108 contrasting the methodological and sampling approach used in this paper with the  
109 recent selection papers by Lee et al. (2022) and Kerner et al. (2023).

110

111 lines 2964-2994 (Supplement):

112 Other recent papers have also modelled selection in West Eurasia during the  
113 Holocene (Le et al. 2022; Kerner et al. 2023); however, it is difficult to directly  
114 compare results due to substantial differences in methodology and sampling.  
115 Lee et al. (2022) use an updated version of the mixture model developed in  
116 Mathieson et al. (2015), which relies on differences in allele frequencies  
117 postdating admixture. As such, they are best powered to detect rapid episodes  
118 of selection following admixture between populations. The selection test used  
119 by Kerner et al. (2023) is based on choosing variants with an estimated  
120 selection coefficient above the 99th quantile from their simulations, and is  
121 therefore best-powered to detect cases of strong selection. In our analyses, we  
122 used a selection test that is well-powered to detect both weak and strong  
123 selection, and we used local ancestry inference to deconvolute the effects of

124 changes in admixture proportions through time, allowing us to detect selection  
125 in a broader range of demographic scenarios.

126  
127 Another key difference is in sampling. Both Lee et al. (2022) and Kerner et al.  
128 (2023) used pseudohaploid data from the 1240k capture array, which is  
129 affected by allelic bias, due to the capture chemistry (Rohland et al. 2022;  
130 Davidson et al. 2023). It remains unclear how sensitive selection results from  
131 the 1240k array are to systematic bias in the recovery of some alleles;  
132 however, Kerner et al. (2023) found that nine of the top 10 variants in their  
133 capture dataset had a frequency trajectory inconsistent with their shotgun  
134 dataset. This suggests that allelic bias from the 1240k capture chemistry may  
135 be a major confounder for tests of selection. In comparison to shotgun data,  
136 Rohland et al. (2022) found that 61.7% of the SNPs on the 1240k capture array  
137 exhibit evidence of allelic bias ( $n=757,587$  with  
138 ``PassFilterForMetaAnalysisBias==0``).

139  
140 A compounding factor may also be systematic differences in capture efficiency  
141 between sites, which results in much smaller sample sizes than the reported  
142 number of ancient individuals. For example, in our analysis of selection at the  
143 LCT locus using the 1240k dataset (Supplementary Figure S2a.56)—which  
144 used the same 1,291 samples as Lee et al. (2022)—we observed that there  
145 were 838 pseudohaploid calls for rs4988235, but only 476 for rs1438307,  
146 indicating capture efficiency varies greatly between sites, as well as between  
147 alleles at the same site. In comparison, our imputed callset contains 1,015  
148 diploid genotypes for all modelled SNPs, and we show via replication (using  
149 genotype-likelihoods) that imputation does not substantively bias our inference  
150 of allele frequency trajectories or selection coefficients.

151  
152  
153  
154  
155

156 *Referee #2 (Remarks to the Author):*

157

158 *The manuscript by Irving-Pease et al. has been substantially revised, and one major*  
159 *advance of the previous submission has now instead been moved to a separate paper*  
160 *(Pearson and Durbin 2023, bioRxiv). The paper provides several highly interesting*  
161 *observations, but similarly to other reviewers I think conclusions tend to not be appropriately*  
162 *caveated.*

163

164 *I have several concerns about the revised paper:*

165 *1. Other manuscripts*

166 *The first is the questions about the delimitations of companion papers and dual publication.*  
167 *This Irving-Pease et al. manuscript is part of a network of papers (Irving-Pease et al.,*  
168 *Allentoft et al., da Mota et al., Barrie et al., Pearson and Durbin). Arguably the greatest*  
169 *advance of the previous manuscript was the deconvolution of ancestry which allowed*  
170 *selection in different ancestral populations to be reconstructed. This is now published in a*  
171 *separate preprint by Pearson and Durbin, which I assume is the primary publication of the*  
172 *method. The main text of this revised paper still claims that this method is "novel"-but surely*  
173 *it is not if it is presented in the preprint. This should be corrected and what is novel in this*  
174 *paper should be delimited from what is presented in other publications.*

175

176 **Response:** The preprint by Pearson & Durbin, which describes the novel method for local  
177 ancestry inference, has been fully reincorporated into the supplement of this paper. The  
178 preprint has not been submitted to any other journal, and we have moved the entirety of the  
179 content into Supplementary Note 1c, replacing the previous benchmarking analysis — the  
180 results of which remain unchanged.

181

182 *The current submission thus reports neither new ancient genomes (which are reported in the*  
183 *Allentoft et al. 'main paper' submission), or strongly novel approaches aside from the*  
184 *incorporation of ancient genome allele frequencies in CLUES (which is a very welcome*  
185 *advance). Also the fascinating signals discussed in the HLA locus are presented in a*  
186 *separate Barrie et al. preprint. Figure 1 is a description of data that is previously published,*  
187 *and presented new by Allentoft et al.*

188

189 *All these aspects reduce the advance that this paper represents, and in my view causes*  
190 *some degree of confusion in the scientific literature.*

191

192 **Response:** Our original submission, dated May 2022, consisted of one large manuscript that  
193 contained all of the results and analyses presented in Allentoft et al. (the “main paper”) and  
194 Irving-Pease et al. (the “selection paper”). It was at the suggestion of Editor that  
195 these were split into two separate papers, to allow more focused presentation of the results.

196

197 We believe this selection manuscript represents a substantial scientific advance that is  
198 independent of the data generated in the main paper (especially now that the novel  
199 LAI method has been reincorporated). In terms of methodological novelty, we present  
200 (i) a new method for performing local ancestry inference; (ii) a new method for inferring  
201 allele frequency trajectories from time-series data; (iii) a novel pipeline for

202 deconvoluting admixture in a selection test; and (iv) a new statistical model to  
203 distinguish direct effects of age on allele frequency from indirect effects mediated by  
204 read depth, read length, and/or error rates. We also apply existing methods in novel  
205 ways, by using ancient populations as donors to “chromosome paint” the UK Biobank,  
206 and by inferring ancestry-specific polygenic risk scores, for which we coin the new  
207 term “Ancestral Risk Scores”. More importantly, we used these novel methodologies to  
208 make substantial biological insights into the strength and timing of selection at key  
209 dietary and immune loci, as well as characterising how differential ancestry has  
210 affected present-day anthropometric and disease traits in the British population.

211

212 Figure 1 shows a map of sampling locations and ages, and was added at the request  
213 of Reviewer 1. Whilst all of these samples are described in other publications, this  
214 figure accurately reflects the breadth and depth of the sampling used in our time-  
215 series selection analyses. The corresponding panel of Figure 1 in the Allentoft et al.  
216 paper only shows the 317 novel genomes presented in that study, and excludes the  
217 majority of the samples used in our analyses.

## 218 *2. Restricting selection scans to 33 thousand functional SNPs*

219 *As mentioned in previous reviews, this paper takes a different approach to previous leading*  
220 *selection papers (e.g. Mathieson et al. 2015, Field et al. 2018) and doesn't scan the entire*  
221 *genome of millions of loci, but only scans 33 thousand SNPs.*

222

223 *In the revised version, the authors respond to these concerns by talking about "causality"*  
224 *and removing any mention of such causality. But to me the point is not about causality, but*  
225 *about whether their approach has identified the SNPs with the most evidence for selection in*  
226 *their data or missed them, a question which could be decoupled from phenotypes altogether.*  
227 *Their analysis of the LCT region seems to prove this point, as when they re-scan the entire*  
228 *broader locus they find that the most evidence for selection is in a SNP not included in the*  
229 *first scan. I think the caveat of other selected SNPs possibly being nearby should be*  
230 *mentioned clearly.*

231

### 232 **Response:**

233

234 Our study design was based on the hypothesis that natural selection would systematically  
235 favour variants with GWAS trait associations, when compared to a control set of non-trait  
236 associated variants. The results from our pan-ancestry analysis confirm this hypothesis, and  
237 show a >9-fold enrichment for evidence of genome-wide significant selection among the  
238 GWAS set of variants. In comparison to Mathieson et al. (2015, *Nature*;  
239 <https://doi.org/10.1038/nature16152>), it is a striking confirmation of our hypothesis (and of  
240 the greater sensitivity of our methods) that we are able to identify 75% more sweep loci (21  
241 vs. 12) when analysing only 6% as many SNPs (66,682 vs. 1,055,209).

242

243 We agree with the reviewer that our experimental design does not guarantee that we have  
244 identified the SNPs with the lowest p-values in our sweep loci. If we were to expand our  
245 analysis to include all 8.5 million SNPs in the imputed callset (a 127-fold increase in the size  
246 of our study), we would likely identify many non-trait associated SNPs with strong evidence  
247 of selection. However, this would not change the conclusions of our paper, which are



248 focused on the phenotypic consequences of selection, not on finding the SNP with the  
249 lowest p-value.

250

251 In the case of the LCT locus, our results demonstrate that exclusively characterising a  
252 selective sweep by the SNP with lowest p-value can obscure important biological signals.  
253 We comprehensively scanned all SNPs within the LCT sweep region, which confirmed our  
254 prior finding that the lactase persistence SNP (rs4988235) exhibits the strongest evidence of  
255 selection at this locus ( $p=1.68e-59$ ). We then analysed the trajectories of all genome-wide  
256 significant SNPs ( $p < 5e-8$ ) within the locus, and ranked them by their *earliest* evidence of  
257 selection. This ranking revealed that the majority of selected SNPs began rising in frequency  
258 thousands of years earlier than the lactase persistence allele, despite all having larger p-  
259 values. This suggests that the LCT locus has experienced at least two separate sweeps, and  
260 that focusing on the SNP with the strongest evidence of selection can obscure selection  
261 signals occurring at deeper time depths.

262

263 **Changes:** We have added an additional caveat to the discussion explicitly stating that  
264 we did not test all non-trait associated variants.

265

266 lines 557-562:

267 Due to the highly pleiotropic nature of each sweep region, it is difficult to  
268 ascribe causal factors to any of our selection signals, and we did not  
269 exhaustively test all non-trait associated variants. However, our results show  
270 that selection during the Holocene has had a substantial impact on present-day  
271 genetic disease risk, as well as the distribution of genetic factors affecting  
272 metabolic and anthropometric traits.

273 *Other points:*

274

275 *Figure 2 shows proportions of ancestry across Eurasia and in Britain, but methods such as*  
276 *CHROMOPAINTER have been demonstrated to be sensitive to demographic history, for*  
277 *example variable rates of genetic drift in different populations (Lawson, van Dorp, and*  
278 *Falush 2018). What are the confidence intervals for these estimates, e.g. of WHG and EHG*  
279 *ancestry in East Asia?*

280

281 **Response:**

282

283 A feature of CHROMOPAINTER, as used here, is that it defines ancestry with respect to a  
284 user-defined reference panel. It is therefore sensitive to the particular details of the model  
285 only as far as the different panels extract information regarding different times and  
286 populations. Lawson, van Dorp, and Falush (2018, *Nature Communications*;  
287 <https://doi.org/10.1038/s41467-018-05257-7>) described a way to check a population history  
288 by contrasting SNP-based and haplotype-based signals. Our analyses pass that test  
289 because our novel LAI method (Supplementary Note 1c) was validated against SNP-based  
290 statistics, and the results concur with CHROMOPAINTER, indicating no reason to expect  
291 gross model-misspecification.

292

293 In general, the confidence intervals for country level means are low, due to the relatively  
 294 large sample sizes in UKB. However, we believe that the important results are not the  
 295 country level means, but the clines across modern populations. To illustrate this, we have  
 296 calculated 95% confidence intervals for each country, by bootstrapping across individuals  
 297 (iterations=1000). We report the results for East Asia below, for EHG and WHG, and include  
 298 the count of individuals for each country.

299  
 300 Given that these ancestries are old, we expect their within-country variance to be low. For  
 301 the UK, this is in the region of +/-5% of the mean, depending on the ancestry, and we  
 302 observe similar results for countries in East Asia where the count of samples is greater than  
 303 30. These narrow confidence intervals are partially due to the effectiveness of our selection  
 304 of individuals for a given country; which is based on density-based clustering of the first 18  
 305 PCs of individuals from the UKB born in that country, to select individuals of a 'typical  
 306 ancestral background' (Supplementary Note 1a). These results give us confidence that the  
 307 clines we see in the average ancestry proportion, as reported in the paper, are real.

308

| Country     | Ancestry | Mean     | Lower CI | Upper CI | Count |
|-------------|----------|----------|----------|----------|-------|
| Singapore   | WHG      | 0.031469 | 0.030554 | 0.032342 | 86    |
| Singapore   | EHG      | 0.058902 | 0.057996 | 0.059811 | 86    |
| Japan       | WHG      | 0.022166 | 0.021667 | 0.022685 | 242   |
| Japan       | EHG      | 0.038967 | 0.038264 | 0.039696 | 242   |
| Hong Kong   | WHG      | 0.032907 | 0.032467 | 0.033335 | 448   |
| Hong Kong   | EHG      | 0.059084 | 0.058650 | 0.059505 | 448   |
| China       | WHG      | 0.029814 | 0.029314 | 0.030325 | 371   |
| China       | EHG      | 0.059305 | 0.058829 | 0.059805 | 371   |
| Philippines | WHG      | 0.037516 | 0.036993 | 0.038088 | 310   |
| Philippines | EHG      | 0.063313 | 0.062698 | 0.063908 | 310   |
| Thailand    | WHG      | 0.035764 | 0.034564 | 0.036930 | 87    |
| Thailand    | EHG      | 0.065922 | 0.064664 | 0.067081 | 87    |
| Indonesia   | WHG      | 0.034818 | 0.032543 | 0.037047 | 35    |
| Indonesia   | EHG      | 0.064188 | 0.062570 | 0.065861 | 35    |

|               |     |          |          |          |    |
|---------------|-----|----------|----------|----------|----|
| Cambodia      | WHG | 0.033638 | 0.030287 | 0.036965 | 7  |
| Cambodia      | EHG | 0.062782 | 0.058422 | 0.067542 | 7  |
| Macau (Macao) | WHG | 0.032064 | 0.027794 | 0.036126 | 6  |
| Macau (Macao) | EHG | 0.059363 | 0.055302 | 0.062830 | 6  |
| Taiwan        | WHG | 0.030333 | 0.028481 | 0.032074 | 23 |
| Taiwan        | EHG | 0.059557 | 0.057596 | 0.061452 | 23 |
| Mongolia      | WHG | 0.013266 | 0.010869 | 0.015703 | 6  |
| Mongolia      | EHG | 0.084820 | 0.078868 | 0.091473 | 6  |
| South Korea   | WHG | 0.025614 | 0.023928 | 0.027248 | 24 |
| South Korea   | EHG | 0.057325 | 0.055454 | 0.059393 | 24 |
| North Korea   | WHG | 0.025231 | 0.021230 | 0.028626 | 5  |
| North Korea   | EHG | 0.053330 | 0.049883 | 0.056928 | 5  |

309

310 **Changes:** We have added an additional caveat to the main text.

311

312 lines 152-155:

313 Overall, these results refine global patterns of spatial distributions of ancient  
314 ancestries amongst present-day individuals. Whilst the absolute admixture  
315 proportions are dependent on the reference samples used, as well as the  
316 treatment of pre- or post-admixture drift, the geographical variation and  
317 associations should be consistent.

318

319 *The paper highlight in the abstract differential Neolithic farmer ancestry across the UK, with*  
320 *higher proportions in the south and east, but this has already been shown by Patterson et al.*  
321 *2021 and Olalde et al. 2018, and the former study addressed exactly the question of why*  
322 *there are these differences in Britain.*

323

324 **Response:**

325

326 Neither Olalde et al. (2018, *Nature*; <https://doi.org/10.1038/nature25738>) nor Patterson et al.  
327 (2022, *Nature*; <https://doi.org/10.1038/s41586-021-04287-4>) estimated genetic ancestry  
328 proportions in modern individuals from the UK, and we believe we are the first to do this.  
329 Furthermore, while both studies used three-way admixture models to show regional variation  
330 in ancestry proportions in the past, both were limited by sparse sampling to broad regional  
331 comparisons (e.g., comparing England and Wales to Scotland). The novelty of our results is

332 in showing that these differences persist into the present-day, can be detected on a fine-  
333 scale basis (e.g., between counties), and exist for several genetic ancestries not previously  
334 studied.

335

336 **Changes:** We now cite Olalde et al. (2018), in addition to Patterson et al. (2022), in  
337 the main text.

338

339 lines 166-171:

340 This regional pattern was already evident in the Pre-Roman Iron Age and  
341 persists to the present day even though immigrating Anglo-Saxons had  
342 relatively less affinities to Neolithic farmers than the Iron-Age individuals of  
343 southwest Briton. Although this Neolithic farmer/Steppe-related dichotomy  
344 mirrors the modern 'Anglo-Saxon'/'Celtic' ethnic divide, its origins are older,  
345 resulting from continuous migration from a continental population relatively  
346 enriched in Neolithic farmer ancestries, starting as early as the Late Bronze  
347 Age (Patterson et al. 2022; Olalde et al. 2018).

348

349 *No state of the art study claims white British are homogeneous. See e.g. Leslie et al. 2015 in*  
350 *which analysis of the POBI data revealed fine-scale structure, and more recently Saada et*  
351 *al. 2020 who analysed the UK Biobank.*

352

353 **Response:**

354

355 We agree with the reviewer that state-of-the-art studies which specifically examine British  
356 population structure do not claim that it is homogenous; however, many studies treat the  
357 'white British' subset of the UK Biobank as a relatively homogenous population, because it  
358 occupies a restricted PCA space with outliers removed. Many studies restrict to this subset  
359 as a first stage of their analysis, particularly those involving GWAS or PRS calculation —  
360 e.g., Sakaue et al. (2021, *Nature Genetics*; <https://doi.org/10.1038/s41588-021-00931-x>) and  
361 Tanigawa et al. (2022, *PLOS Genetics*; <https://doi.org/10.1371/journal.pgen.1010105>).  
362 Furthermore, while Leslie et al. (2015, *Nature*; <https://doi.org/10.1038/nature14230>) and  
363 Saada et al. (2020, *Nature Communications*; <https://doi.org/10.1038/s41467-020-19588-x>)  
364 both find geographically-based clusters of individuals from the UK, based on haplotype-  
365 sharing or identity-by-descent, neither is able to offer more than speculative historical  
366 reasons for the clustering. Our results demonstrate that there are systematic ancestry  
367 differences within the 'white British' subset which have not previously been described, and  
368 add to the consensus that care is needed to account for population structure.

369

370 **Changes:** We have removed the statement that the white British population is  
371 "traditionally considered relatively homogenous".

372

373 lines 174-176:

374 These results demonstrate clear ancestry differences within an 'ethnic group'  
375 (white British), highlighting the need to account for subtle population structure  
376 when using resources such as the UK Biobank genomes (Zaidi and Mathieson  
377 2020).

378

379 *They claim that the most strongly selected pigmentation alleles reached fixation several*  
380 *thousand years ago, but to me it is hard to see what is novel compared to evidence*  
381 *presented e.g. by Ju and Mathieson 2021.*

382  
383 **Response:** Our results replicate the signal reported in Ju and Mathieson (2021, *PNAS*  
384 <https://doi.org/10.1073/pnas.2009227118>) that selection has acted on skin pigmentation by  
385 favouring a limited subset of large-effect alleles, and we duly cite their paper in the main text.  
386 The novelty of our analysis is in the deconvolution of ancestry, which allows us to trace the  
387 timing of these changes in each of the four ancestral paths leading to present-day  
388 Europeans. We show that selection occurred early on in groups that were moving  
389 northwards and westwards, and only later in the Western hunter-gatherer background after  
390 these groups encountered and admixed with the incoming populations.

391  
392 *"The selective forces likely favouring ApoE2 in Steppe pastoralists may be associated with*  
393 *protective immune responses against infectious challenges, such as protection against*  
394 *severe childhood malaria or infection with an unknown coronavirus" -why specifically a*  
395 *coronavirus? This seems sensationalistic.*

396  
397 **Response:** The link between ApoE isoforms and coronaviruses is discussed in  
398 Supplementary Note 2f:

399  
400 lines 4875-4889 (Supplement):

401 The impacts of ApoE isoforms on severe acute respiratory virus 2 (SARS-CoV-  
402 2) infection risk, disease progression, and mortality are under investigation.  
403 One study has linked ApoE2 to a decrease in the risk of SARS-CoV-2 infection  
404 but not to the severity of the disease<sup>60</sup>. Several other papers have linked  
405 ApoE4 to an increased risk of infection and more severe disease<sup>61-63</sup>. In  
406 addition, ApoE4 has been linked to microvascular damage in the brain and  
407 increased neuroinflammation, with some pathways overlapping those activated  
408 in Alzheimer's<sup>64</sup>, suggesting SARS-CoV-2 infection might work as a dementia  
409 disease accelerator, specifically in those suffering from - or predisposed to -  
410 Alzheimer's dementia. No studies appear to have investigated the link between  
411 ApoE isotypes and other human coronaviruses according to PubMed searches  
412 (HCoV-229E, HCoV-OC43, HCoV-HKU1, HCoV-NL63, MERS-CoV, and  
413 SARS-CoV-1). Taken together, these somewhat incomplete results suggest  
414 that it is possible ApoE2 might have reduced the risk of infection with a SARS-  
415 CoV-2-like coronavirus and might thus have been positively selected for in  
416 regions of high endemicity of this (and possibly several) coronaviruses.  
417 However, this suggestion is highly speculative due to the lack of data.

418  
419 **Changes:** We have updated the main text reference to an "unknown viral infection",  
420 rather than an "unknown coronavirus", as ApoE isoforms have been associated with  
421 multiple infectious diseases.

422  
423 lines 536-539:

424 The selective forces likely favouring ApoE2 in Steppe pastoralists may be  
425 associated with protective immune responses against infectious challenges,

426 such as protection against severe childhood malaria or an unknown viral  
427 infection (Supplementary Note 2f, Supplementary Table S2f.3).

428

429 *Overall, I think this paper provides an interesting and valuable analysis of the new*  
430 *substantial data to-be-presented in the Allentoft et al. preprint, but has reduced novelty due*  
431 *to the expansive network of multiple publications.*

432

433 **Response:** We thank the reviewer for their constructive feedback and we hope that our  
434 responses have clarified the novelty of our methods, results and conclusions. It is our view  
435 that the network of related publications has helped us present these results in a more  
436 coherent and focused manner, and made them more accessible to a broader audience.

437 **Referee #4 (Remarks to the Author):**

438

439 *The authors present a rigorous analysis of selection on complex traits in Europe over the last*  
440 *12,000 years using ~1,600 imputed ancient genomes. They also describe the role of ancient*  
441 *admixture in shaping the genetic variation underlying complex traits in present-day*  
442 *Europeans. I found the manuscript very interesting and for the most part, clearly written. This*  
443 *is not easy given the limited space. The authors also seem to have done a commendable job*  
444 *of responding to the reviewers' comments constructively and addressing them.*

445

446 *In particular, reviewer 3's comment on the weak link between selection hits and trait-*  
447 *associated variants was well-made. As the authors wrote, connecting selection hits to traits*  
448 *is not trivial and remains an unsolved problem in the field. This does not kill the study as long*  
449 *as the results are properly caveated, which they are. The authors have also toned down the*  
450 *language throughout the paper sufficiently so as not to imply that a signal of selection on a*  
451 *variant implies selection on a trait that the variant or some other variant nearby might be*  
452 *associated with.*

453

454 **Response:** We thank the reviewer for their positive feedback.

455

456 *I do have some minor comments:*

457

458 *1. The differences in ancestral risk scores seen in Fig. 6 could yet be due to subtle inflation*  
459 *in effect sizes due to stratification in the original GWAS given that there are ancestry*  
460 *gradients in UKB in the same direction. For example, they found height ARS to be higher for*  
461 *Steppe compared to WHG, which is consistent with people in the north being taller and*  
462 *having more Steppe ancestry compared to people in the south who have more WHG*  
463 *ancestry. This could either be a real signal — that the ancestry gradient actually contributes*  
464 *to the north-south cline in height — or it could be because the GWAS effect sizes are*  
465 *influenced by uncorrected stratification in the UKB. The authors recognize this as well in*  
466 *Supplementary note S2f and I don't necessarily think this is the case. But I wonder, given the*  
467 *strongly worded statement in lines 554, if the authors should also state this caveat in the*  
468 *main text.*

469

470 **Changes:** We have added an additional caveat to the main text.

471

472 lines 549-550:

473

However, our results do not preclude the possibility that height has been  
selected for in specific populations (Chen et al. 2020; Howe et al. 2022), nor do  
they prove that UK Biobank effect sizes are free from uncorrected stratification.

474

475

476

477



478 *2. In Figs. 3 and S1c1, please clarify that the numbers along the paths are effective*  
479 *population sizes (presumably).*

480

481 **Changes:** We have amended the figure caption to make this clearer.

482

483 lines 206-209:

484 Fig 3. A schematic of the model of population structure in Europe, used to  
485 simulate genomes to train the local ancestry neural network classifier. Moving  
486 down the figure is forwards in time and the population split times and admixture  
487 times are given in generations ago. Each branch is labelled with the effective  
488 population size of the population. Coloured lines represent the populations  
489 declared in the simulation that extend through time.

490

491 *3. I couldn't find the generation time used to convert the time in generations in Figs. 3 and*  
492 *S1c1 and the time in years in Fig. 4.*

493

494 *Presumably between 25-30 years given the scales but good to be explicit.*

495

496 **Changes:** We have updated Supplementary Note 2a with the generation time used.

497

498 lines 1668-1670:

499 We converted the calendrical ages of the samples into generations by  
500 assuming a generation time of 28 years (Moorjani et al. 2016).

501

## **Reviewer Reports on the Second Revision:**

Referees' comments:

Referee #2 (Remarks to the Author):

The authors have added caveats for the majority of the points I raised, and while I don't necessarily share all their preferences, these caveats are satisfactory. I congratulate them on the major joint effort and contribution that this manuscript represents.

My remaining comment is that the admixture proportions outside of Europe from the worldwide CHROMOPAINTER analysis (Figure 2) remain quite extraordinary claims, somewhat disconnected from the rest of the manuscript.

Do the authors indeed claim that the EHG, early Holocene eastern European hunter-gatherers, contributed ~6% of the ancestry in present-day Philippines, and similarly for other countries in East Asia? This seems very important for our understanding of prehistory if true, but should then be confirmed further and put in context of other ancient DNA and modern DNA studies of the regions that suggested simpler models. Or do they think that they do not necessarily imply a direct contribution of these ancient populations due to uncertainties in the source panels and model?

In relation to this point, obtaining confidence intervals by bootstrapping across individuals seems quite clearly incorrect, as it doesn't account for evolutionary variance. Uncertainty for admixture proportions is usually obtained by bootstrapping across chromosomes or loci. I don't necessarily request a new analysis, if indeed the authors do not necessarily believe the admixture proportions to be robust and will clarify this throughout the text and figure.

## Author Rebuttals to Second Revision:

### **Referee #2 (Remarks to the Author):**

*The authors have added caveats for the majority of the points I raised, and while I don't necessarily share all their preferences, these caveats are satisfactory. I congratulate them on the major joint effort and contribution that this manuscript represents.*

*My remaining comment is that the admixture proportions outside of Europe from the worldwide CHROMOPAINTER analysis (Figure 2) remain quite extraordinary claims, somewhat disconnected from the rest of the manuscript.*

*Do the authors indeed claim that the EHG, early Holocene eastern European hunter-gatherers, contributed ~6% of the ancestry in present-day Philippines, and similarly for other countries in East Asia? This seems very important for our understanding of prehistory if true, but should then be confirmed further and put in context of other ancient DNA and modern DNA studies of the regions that suggested simpler models. Or do they think that they do not necessarily imply a direct contribution of these ancient populations due to uncertainties in the source panels and model?*

*In relation to this point, obtaining confidence intervals by bootstrapping across individuals seems quite clearly incorrect, as it doesn't account for evolutionary variance. Uncertainty for admixture proportions is usually obtained by bootstrapping across chromosomes or loci. I don't necessarily request a new analysis, if indeed the authors do not necessarily believe the admixture proportions to be robust and will clarify this throughout the text and figure.*

**Response:** We have added an additional caveat to the main text to address this issue. It was not our intention to imply that Eastern Hunter Gatherers (EHG) migrated into the Philippines and admixed directly with local hunter gatherer groups there, or anywhere else in East Asia. Our CHROMOPAINTER results are best interpreted as depicting shared genetic affinities between present-day populations and the ancestral source populations used for the local ancestry inference. In East Asia, our ancestral source populations are less directly related to present-day individuals than they are in West Eurasia, and therefore, the results should not be interpreted as literal movements of people. In East Asia, EHG ancestry is the best match among our source populations for a closely related ancestry present across the region in variable quantities.

### **Changes:**

lines 142-147:

We caution, however, that absolute admixture proportions should be interpreted with caution in regions where our ancient source populations are less directly related to present-day individuals, such as in Africa and East Asia. Whilst these values are dependent on the reference samples used, as well as the treatment of pre- or post-admixture drift, the relative geographical variation and associations should remain consistent.
